# Supplementary material for: The Environmental Niche of the Tuna Purse Seine Fleet in the Western and Central Pacific Ocean Based on Different Fisheries Data
Source: MDPI journal article supplement (doi:10.3390/fishes8020078), 2023-01-29
Supplement: s1 [file s1]

## Supplementary Materials for

The environmental niche of tuna purse seine fisheries in the Western and Central Pacific Ocean based on different fishery data.

Shenglong Yang<sup>1,2,\*</sup>, Linlin Yu<sup>1,3</sup>, Fei Wang<sup>1,2</sup>, Tianfei Chen<sup>1,2</sup>, Yingjie Fei<sup>3</sup>, Shengmao Zhang<sup>1,2</sup>, Wei Fan<sup>1,2\*</sup>

\*Correspondence: ysl6782195@126.com; fanwee@126.com

This PDF file includes:

**Figure S1.** The fishing effort and number of fishing vessels during 2012-2020.

**Figure S2.** The spatial distribution of MPA and EEZ locations.

**Figure S3.** The spatial distribution of commercial fishery data during 2015-2020

**Figure S4.** The average importance scores for different MaxEnt models

**Figure S5.** Jackknife test results of the variable importance derived for each month in the GFW\_0.25° model. The blue and green bars correspond to the effect on model gained by using and sequentially removing each variable from the model, respectively.

**Figure S6.** Jackknife test results of the variable importance derived for each month in the GFW\_0.5° model. The blue and green bars correspond to the effect on model gained by using and sequentially removing each variable from the model, respectively.

**Figure S7.** Jackknife test results of the variable importance derived for each month in the GFW\_1° model. The blue and green bars correspond to the effect on model gained by using and sequentially removing each variable from the model, respectively.

**Figure S8.** Jackknife test results of variable importance derived for each month in the WPCFC model. The blue and green bars correspond to the effect on model gained by using and sequentially removing each variable from the model, respectively.

**Figure S9.** Response curves for important variables in all months in the GFW\_0.25° model.

**Figure S10.** Response curves for important variables in all months in the GFW\_0.5° model.

**Figure S11.** Response curves for important variables in all months in the GFW\_1° model.

**Figure S12.** Response curves for important variables in all month in the WPCFC model.

**Figure S13.** Frequency distribution of important variables based on EF data at the 0.25° spatial scale

**Figure S14.** Frequency distribution of important variables based on EF data at the 0.5° spatial scale

**Figure S15.** Frequency distribution of important variables based on EF data at the 1° spatial scale

**Figure S16.** Frequency distribution of important variables based on commercial fishery data at the 1° spatial scale

**Figure S17.** The spatial distribution of fishing locations (black dots) overlain on habitat suitability maps for each month during 2015-2019 in the GFW\_0.25° model.

**Figure S18.** The spatial distribution of fishing locations (black dots) overlain on habitat suitability maps for each month in 2020 in the GFW\_0.25° model.

**Figure S19.** The spatial distribution of fishing locations (black dots) overlain on habitat suitability maps for each month during 2015-2019 in the GFW\_0.5° model.

**Figure S20.** The spatial distribution of fishing locations (black dots) overlain on habitat suitability maps for each month in 2020 in the GFW\_0.5° model.

**Figure S21.** The spatial distribution of fishing locations (black dots) overlain on habitat suitability maps for each month during 2015-2019 in the GFW\_1° model.

**Figure S22.** The spatial distribution of fishing data locations (black dots) overlain on habitat suitability maps for each month in 2020 in the GFW\_1° model.

**Figure S23.** The spatial distribution of fishery data locations (black dots) overlain on habitat suitability maps for each month during 2015-2019 based on fishery data.

**Figure S24.** The spatial distribution of fishery locations (black dots) overlain on habitat suitability maps for each month in 2020 based on fishery data.

**Figure S25.** The spatial distribution of sample data in the GFW\_0.25° model based on FE data. Red dots show the presence locations used for training, while violet dots show test locations.

**Figure S26.** The spatial distribution of sample data in the GFW\_0.5° model based on FE data. Red dots show the presence locations used for training, while violet dots show test locations.

**Figure S27.** The spatial distribution of sample data in the GFW\_1° model based on FE data. Red dots show the presence locations used for training, while violet dots show test locations.

**Figure S28.** The spatial distribution of sample data in the GFW\_1° model based on fishery data. Red dots show the presence locations used for training, while violet dots show test locations..

**Table S1.** Summary of environmental data and description

**Table S2.** Summary of VIF statistics.

**Table S3** Contribution of each factor in each month for the GFW\_0.25° model.

**Table S4** Contribution of each factor in each month for the GFW\_0.5° model.

**Table S5** Contribution of each factor in each month for the GFW\_1° model.

**Table S6** Contribution of each factor in each month for the WPCFC model.

**Table S7.** Summary statistics derived from different models without masks.

**Table S8.** The relative average contributions of the variables to the Maxent model without masks.

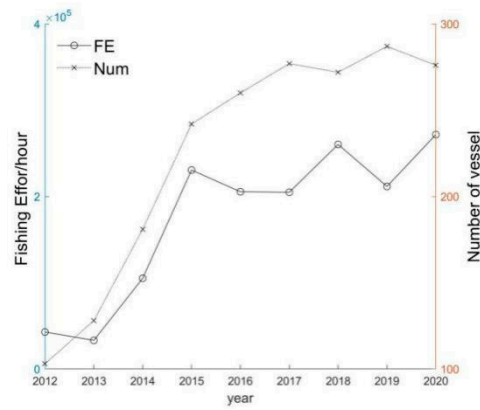

**Figure S1.** The fishing effort and number of fishing vessels during 2012-2020

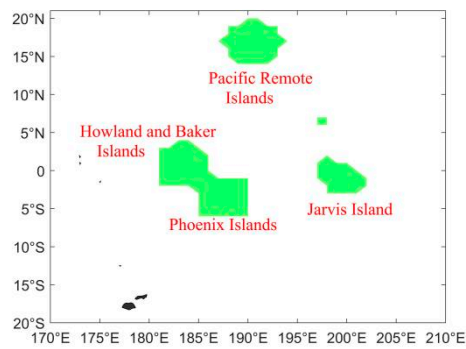

**Figure S2.** The spatial distribution of MPA and EEZ locations

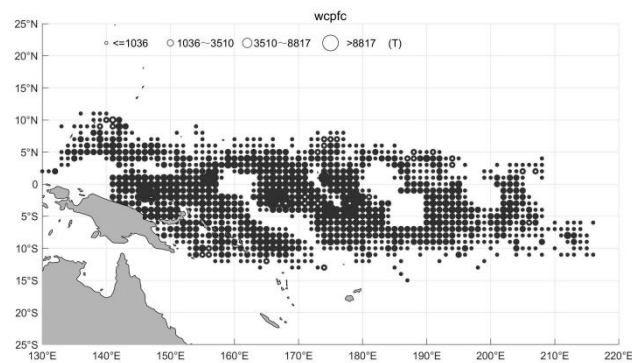

**Figure S3.** The spatial distribution of commercial fishery data during 2015-2020

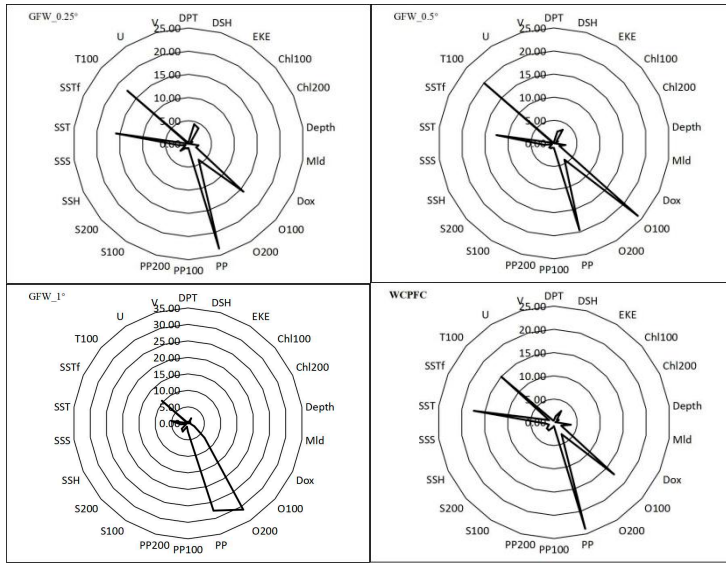

**Figure S4.** The average importance scores for different MaxEnt models

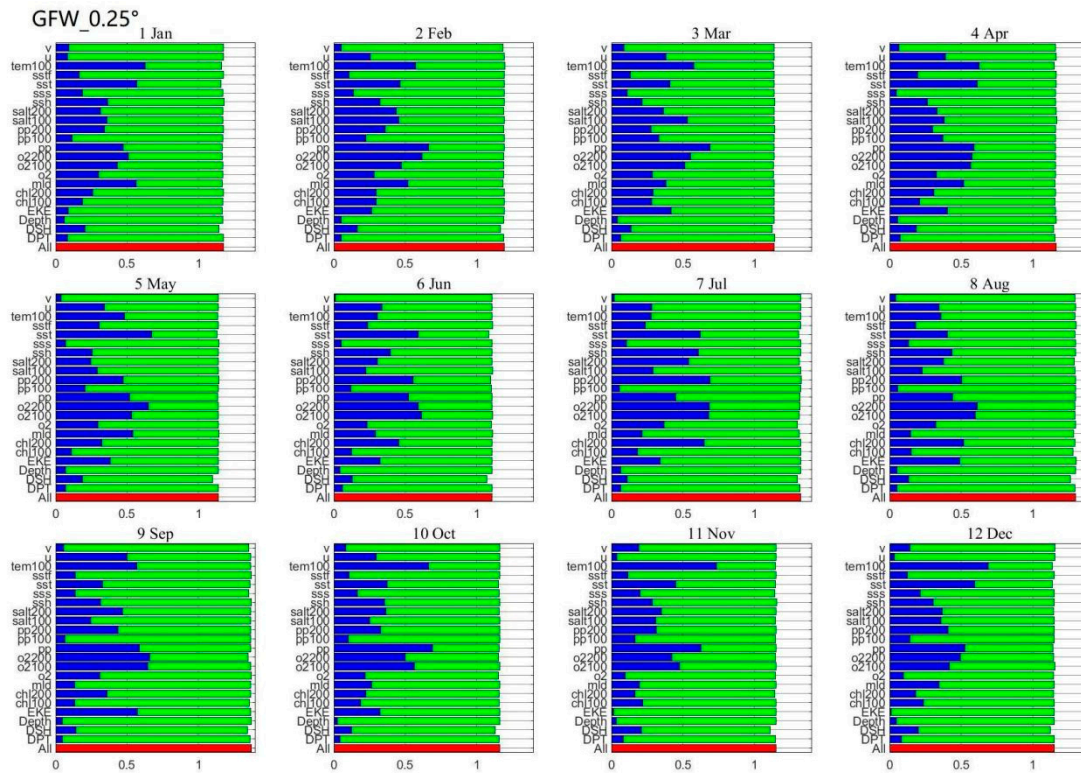

**Figure S5.** Jackknife test results of the variable importance derived for each month in the GFW\_0.25° model. The blue and green bars correspond to the effect on model gained by using and sequentially removing each variable from the model, respectively.

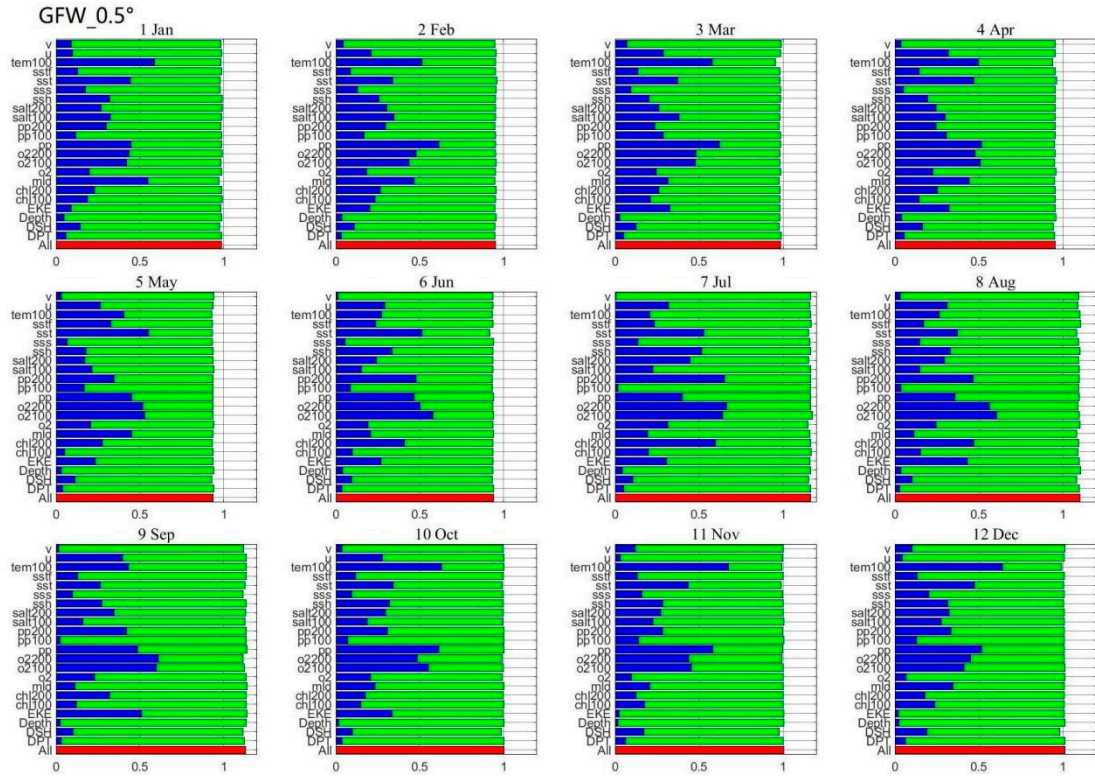

**Figure S6.** Jackknife test results of the variable importance derived for each month in the GFW\_0.5° model. The blue and green bars correspond to the effect on model gained by using and sequentially removing each variable from the model, respectively.

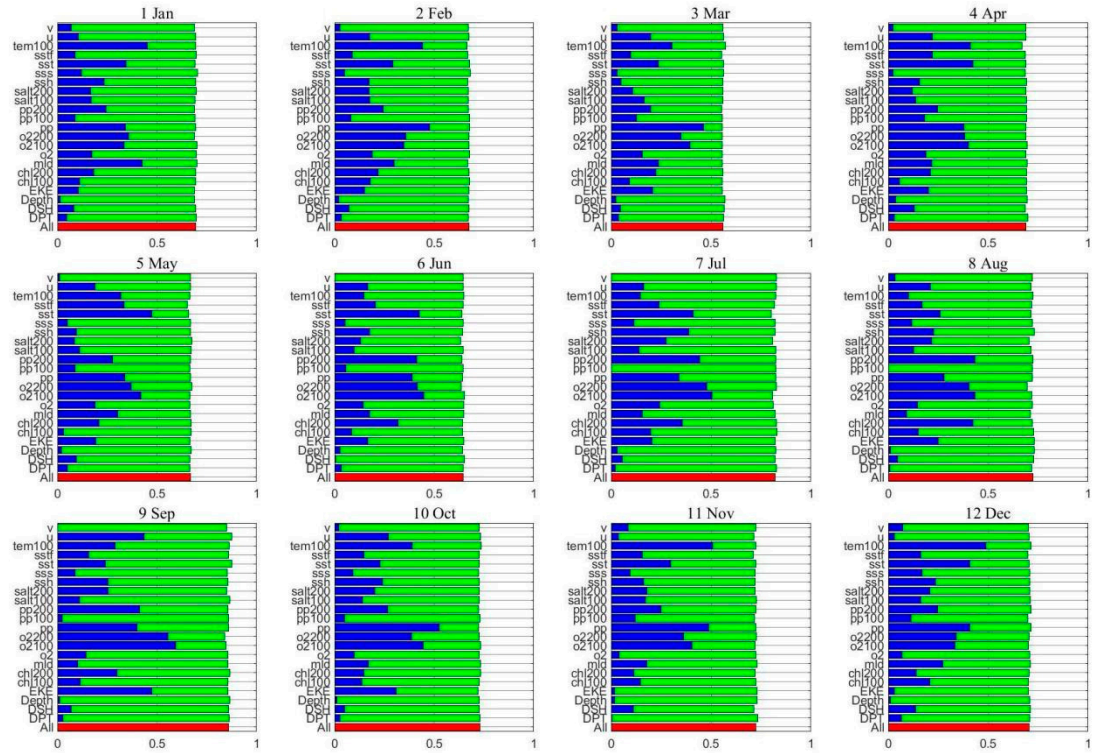

**Figure S7.** Jackknife test results of the variable importance derived for each month in the GFW\_1° model. The blue and green bars correspond to the effect on model gained by using and sequentially removing each variable from the model, respectively.

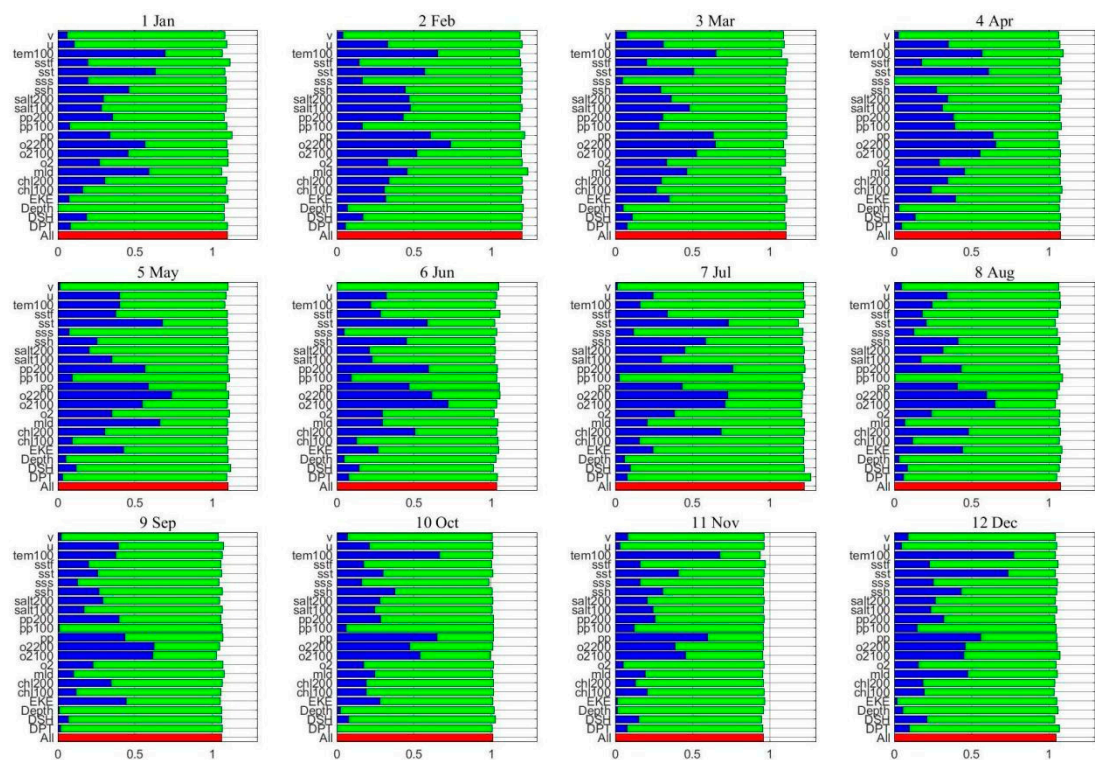

**Figure S8.** Jackknife test results of variable importance derived for each month in the WPFCF model. The blue and green bars correspond to the effect on model gained by using and sequentially removing each variable from the model, respectively.

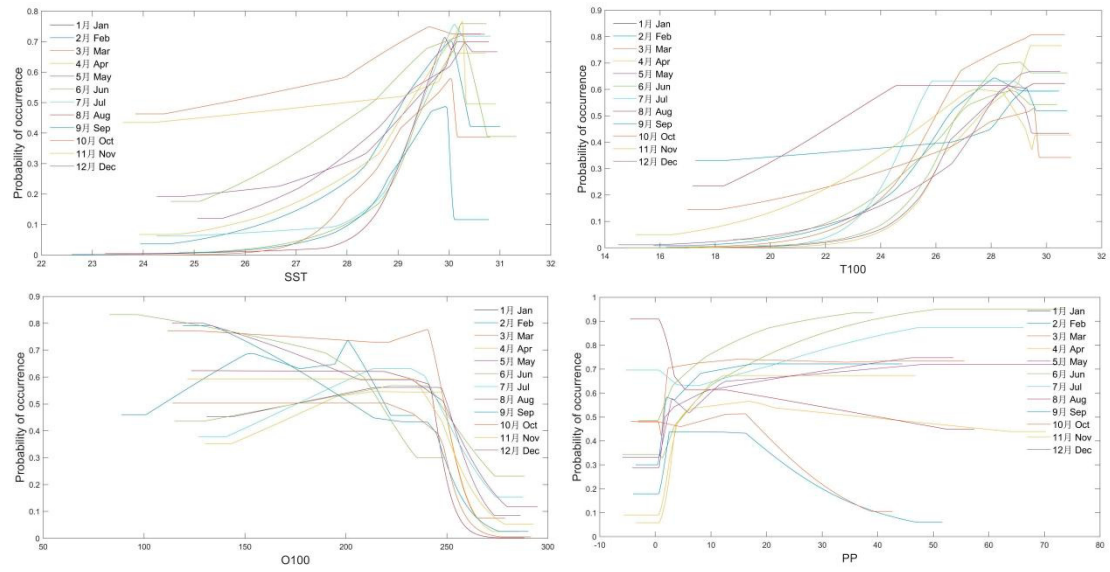

**Figure S9.** Response curves for important variables in all months in the GFW\_0.25° model.

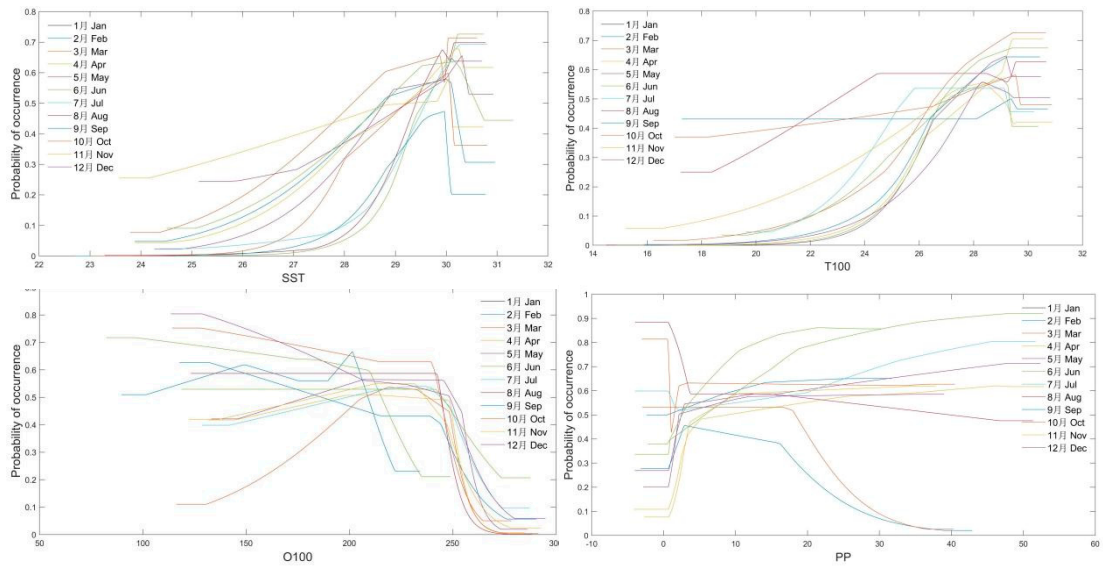

**Figure S10.** Response curves for important variables in all months in the GFW\_0.5° model.

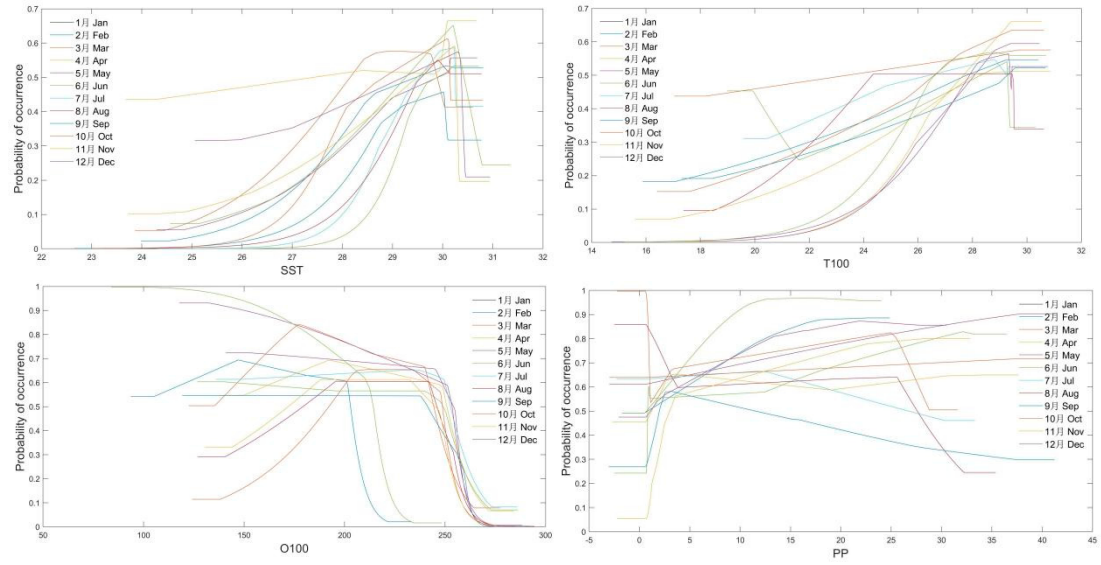

**Figure S11.** Response curves for important variables in all months in the GFW\_1° model.

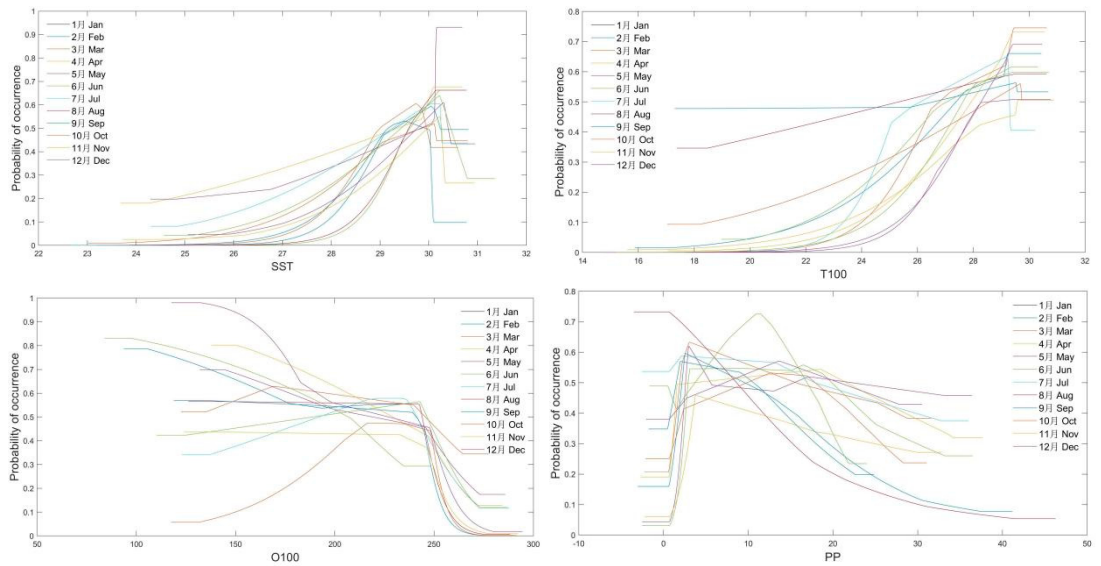

**Figure S12.** Response curves for important variables in all month in the WPCFC model.

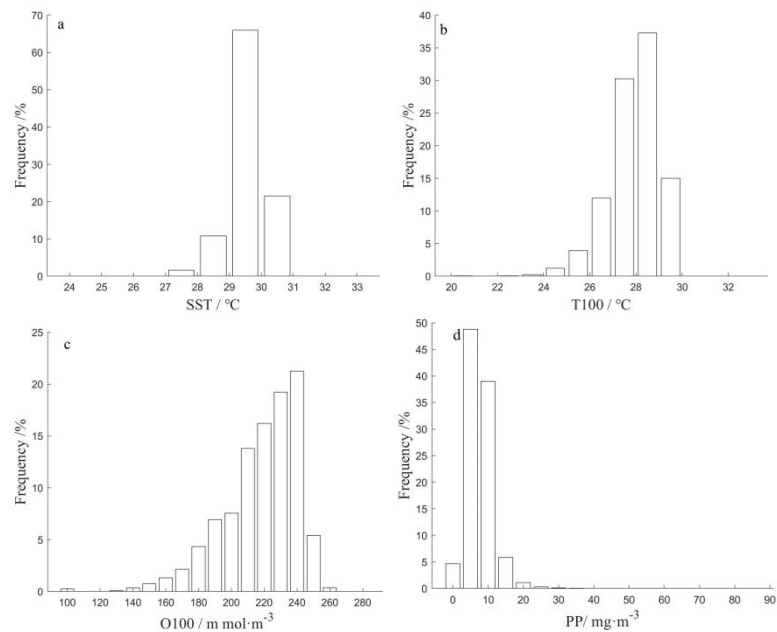

**Figure S13.** Frequency distribution of important variables based on EF data at the 0.25° spatial scale.

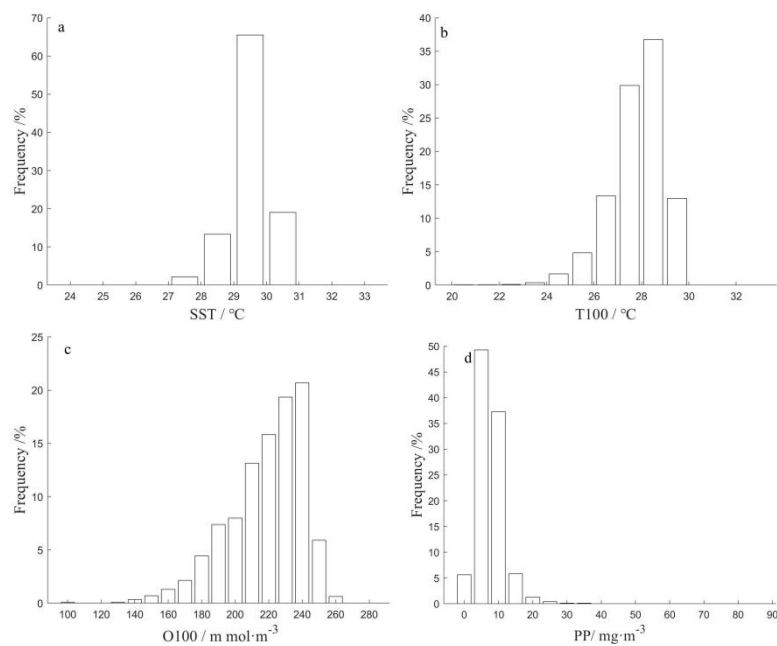

**Figure S14.** Frequency distribution of important variables based on EF data at the 0.5° spatial scale.

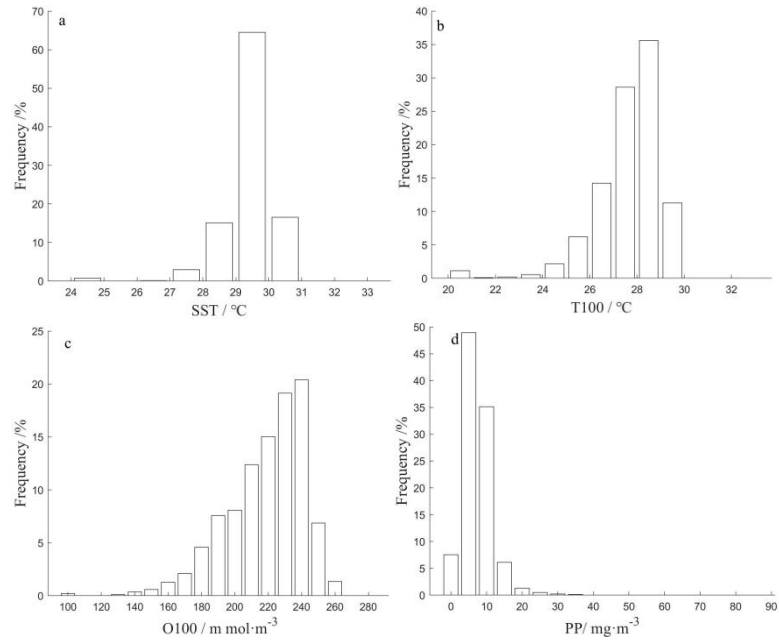

**Figure S15.** Frequency distribution of important variables based on EF data at the 1° spatial scale.

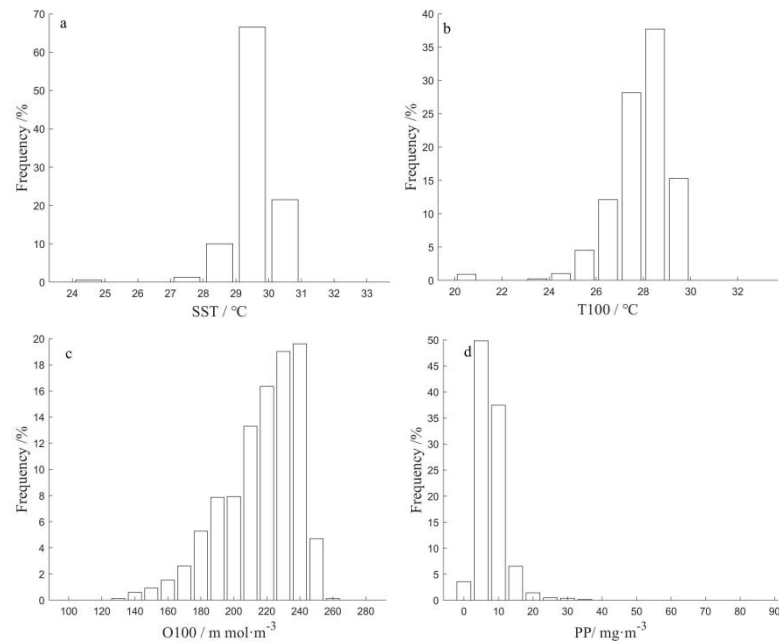

**Figure S16.** Frequency distribution of important variables based on commercial fishery data at the 1° spatial scale.

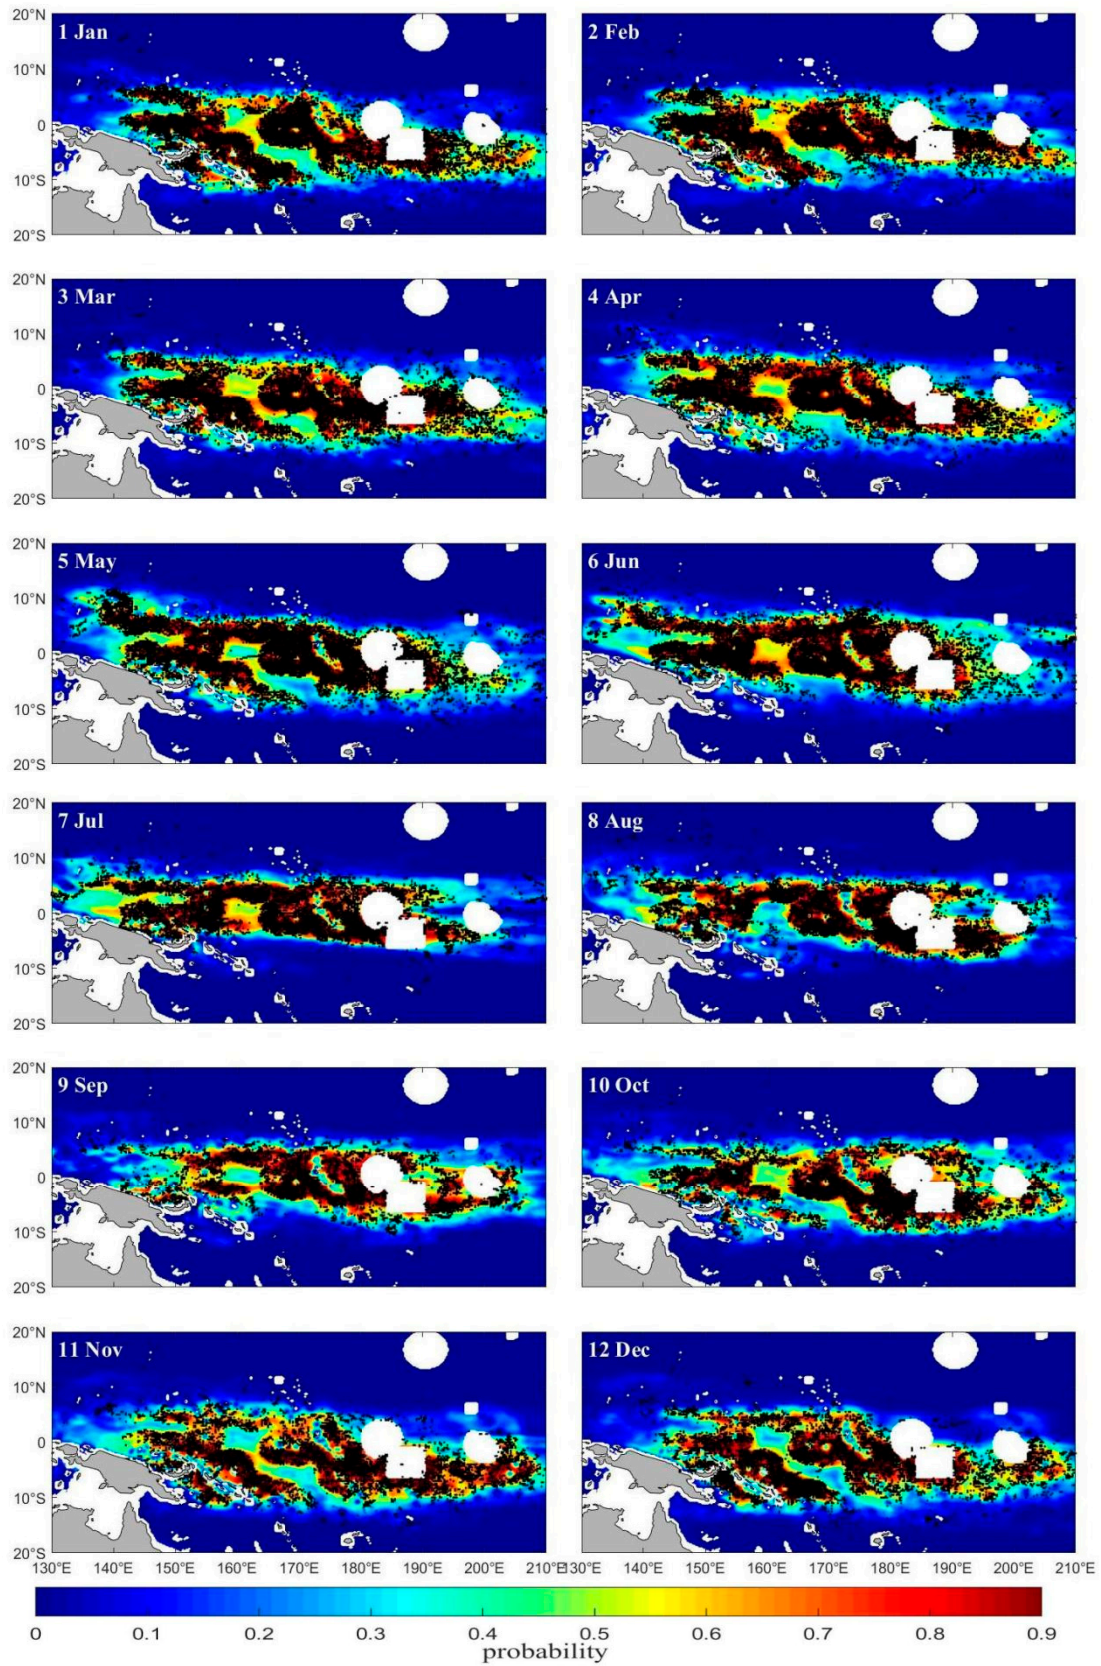

**Figure S17.** The spatial distribution of fishing locations (black dots) overlain on habitat suitability maps for each month during 2015-2019 in the GFW\_0.25° model.

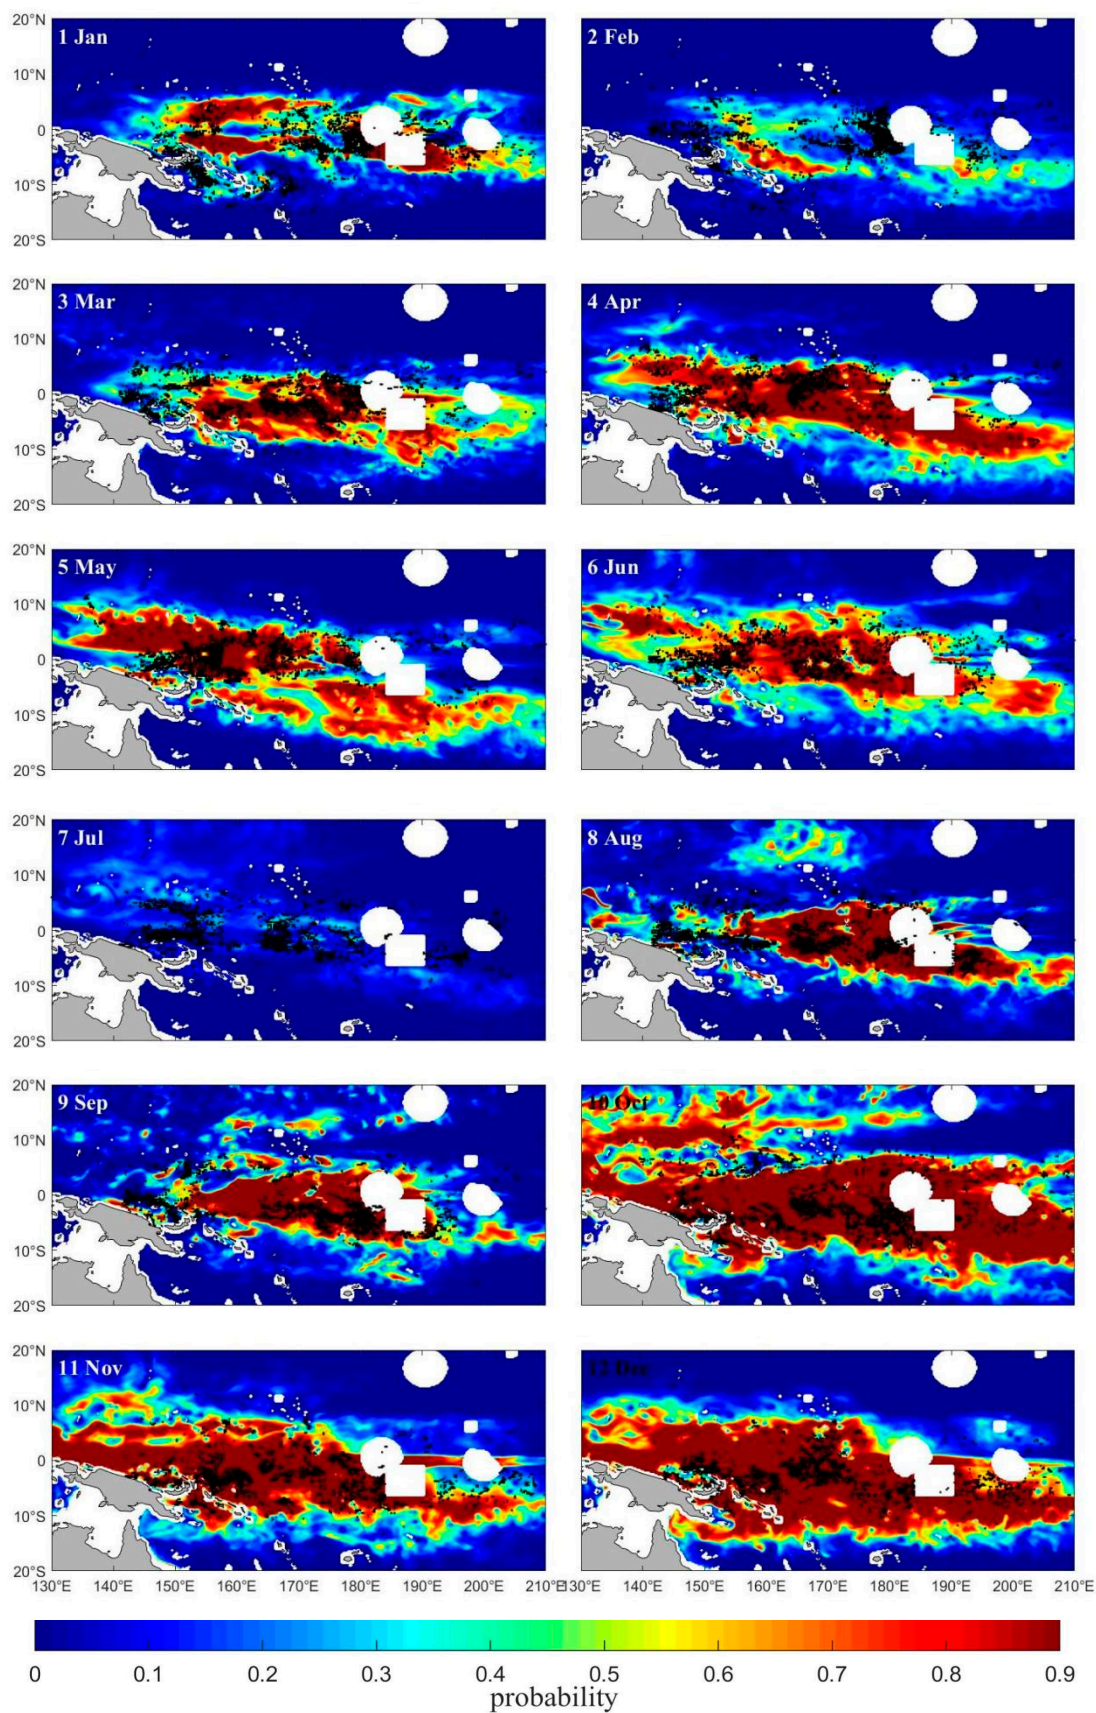

**Figure S18.** The spatial distribution of fishing locations (black dots) overlain on habitat suitability maps for each month in 2020 in the GFW\_0.25° model.

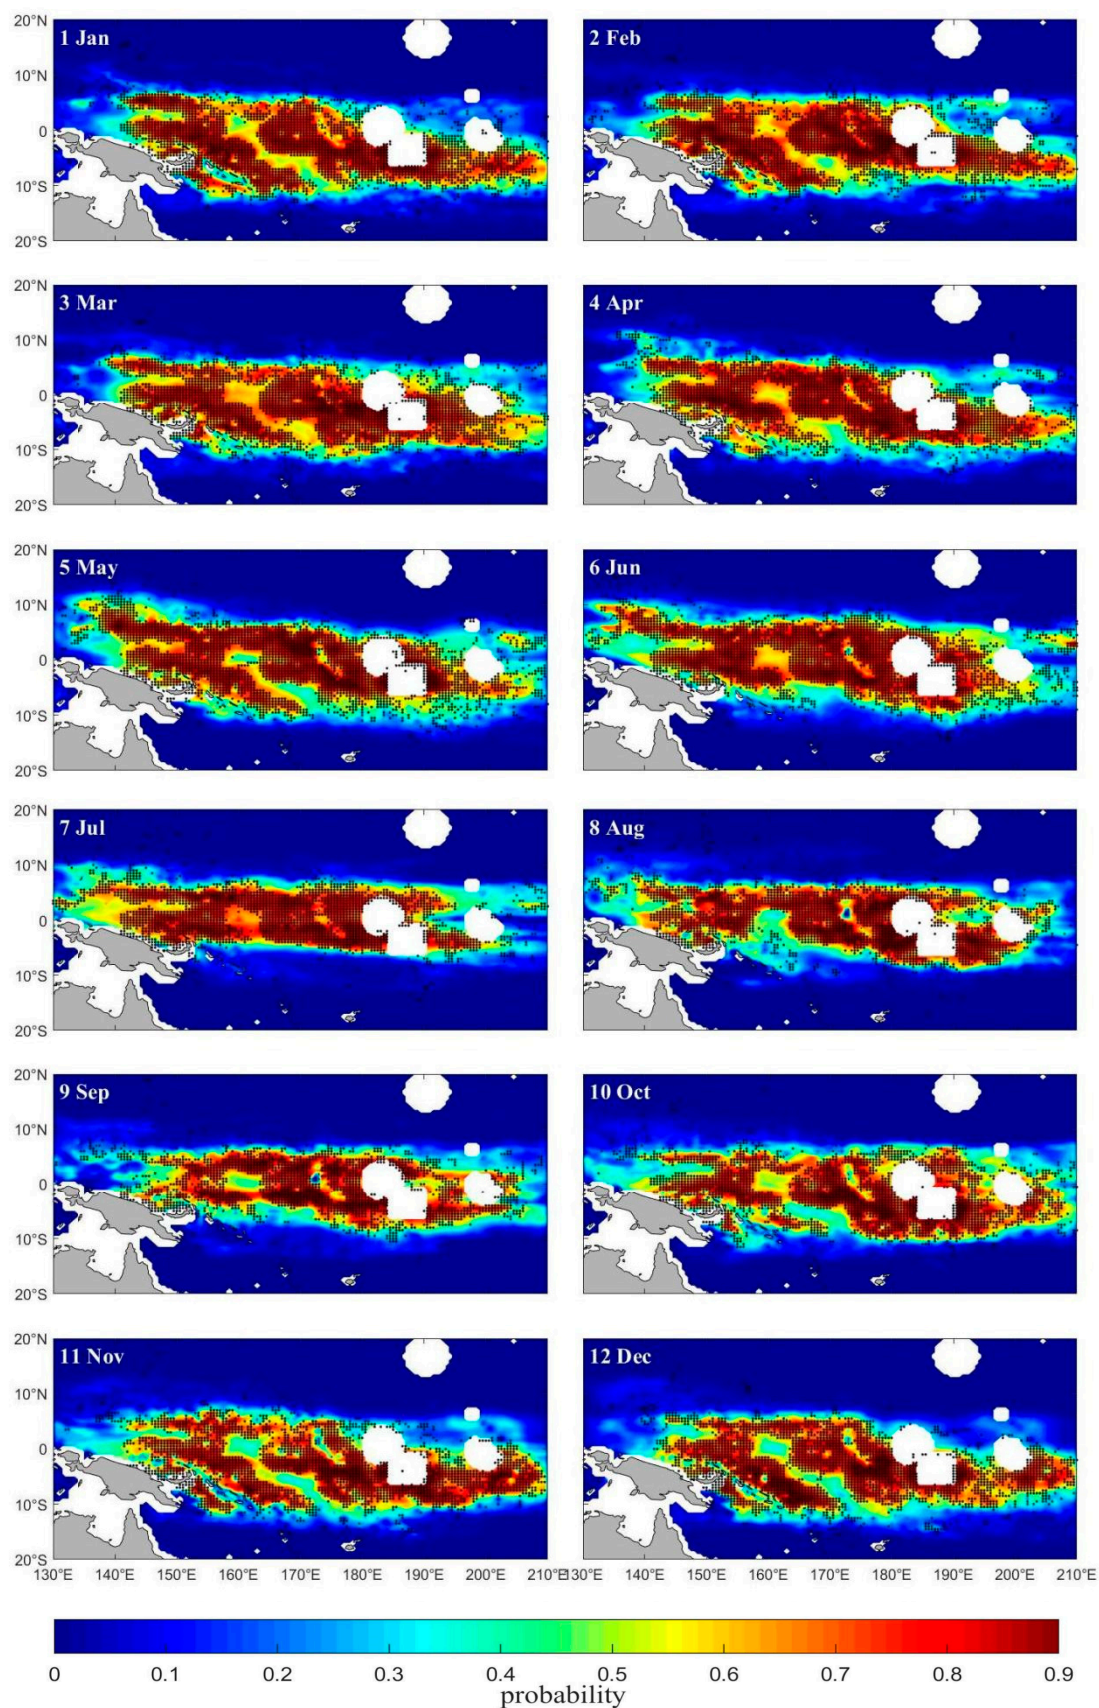

**Figure S19.** The spatial distribution of fishing locations (black dots) overlain on habitat suitability maps for each month during 2015-2019 in the GFW\_0.5° model.

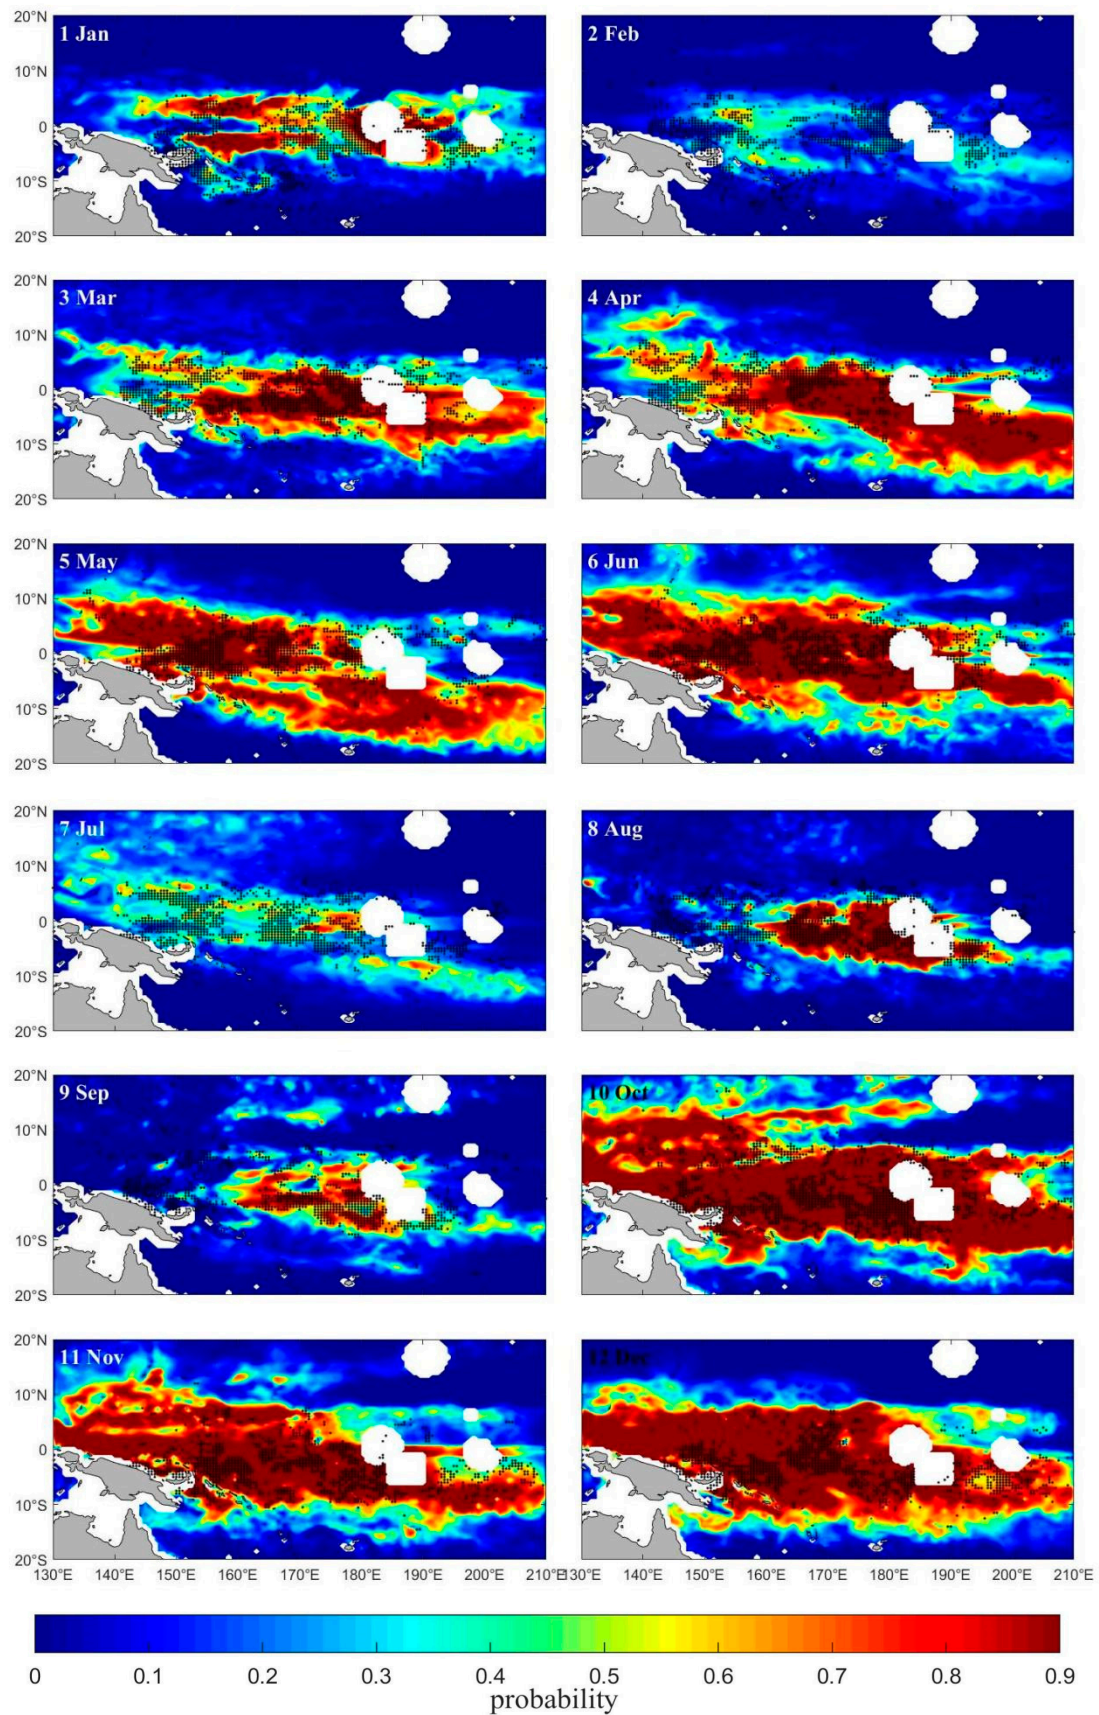

**Figure S20.** The spatial distribution of fishing locations (black dots) overlain on habitat suitability maps for each month in 2020 in the GFW\_0.5° model.

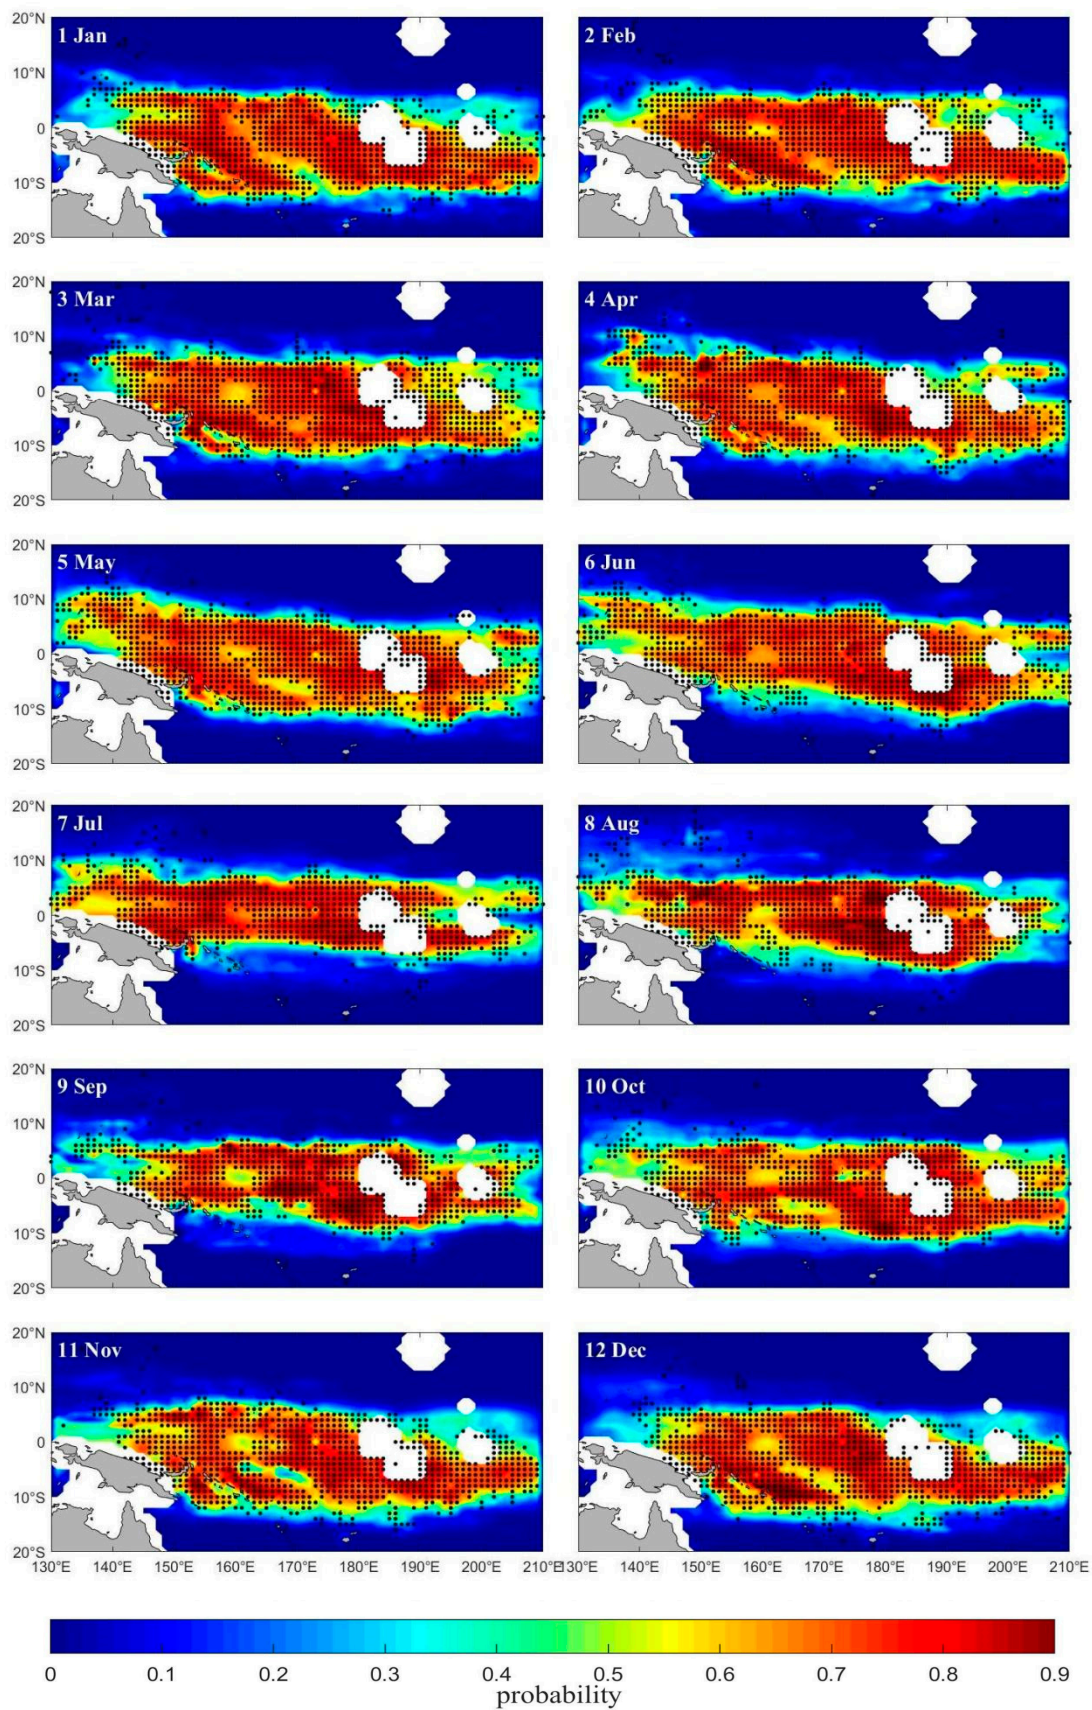

**Figure S21.** The spatial distribution of fishing locations (black dots) overlain on habitat suitability maps for each month during 2015-2019 in the GFW\_1° model.

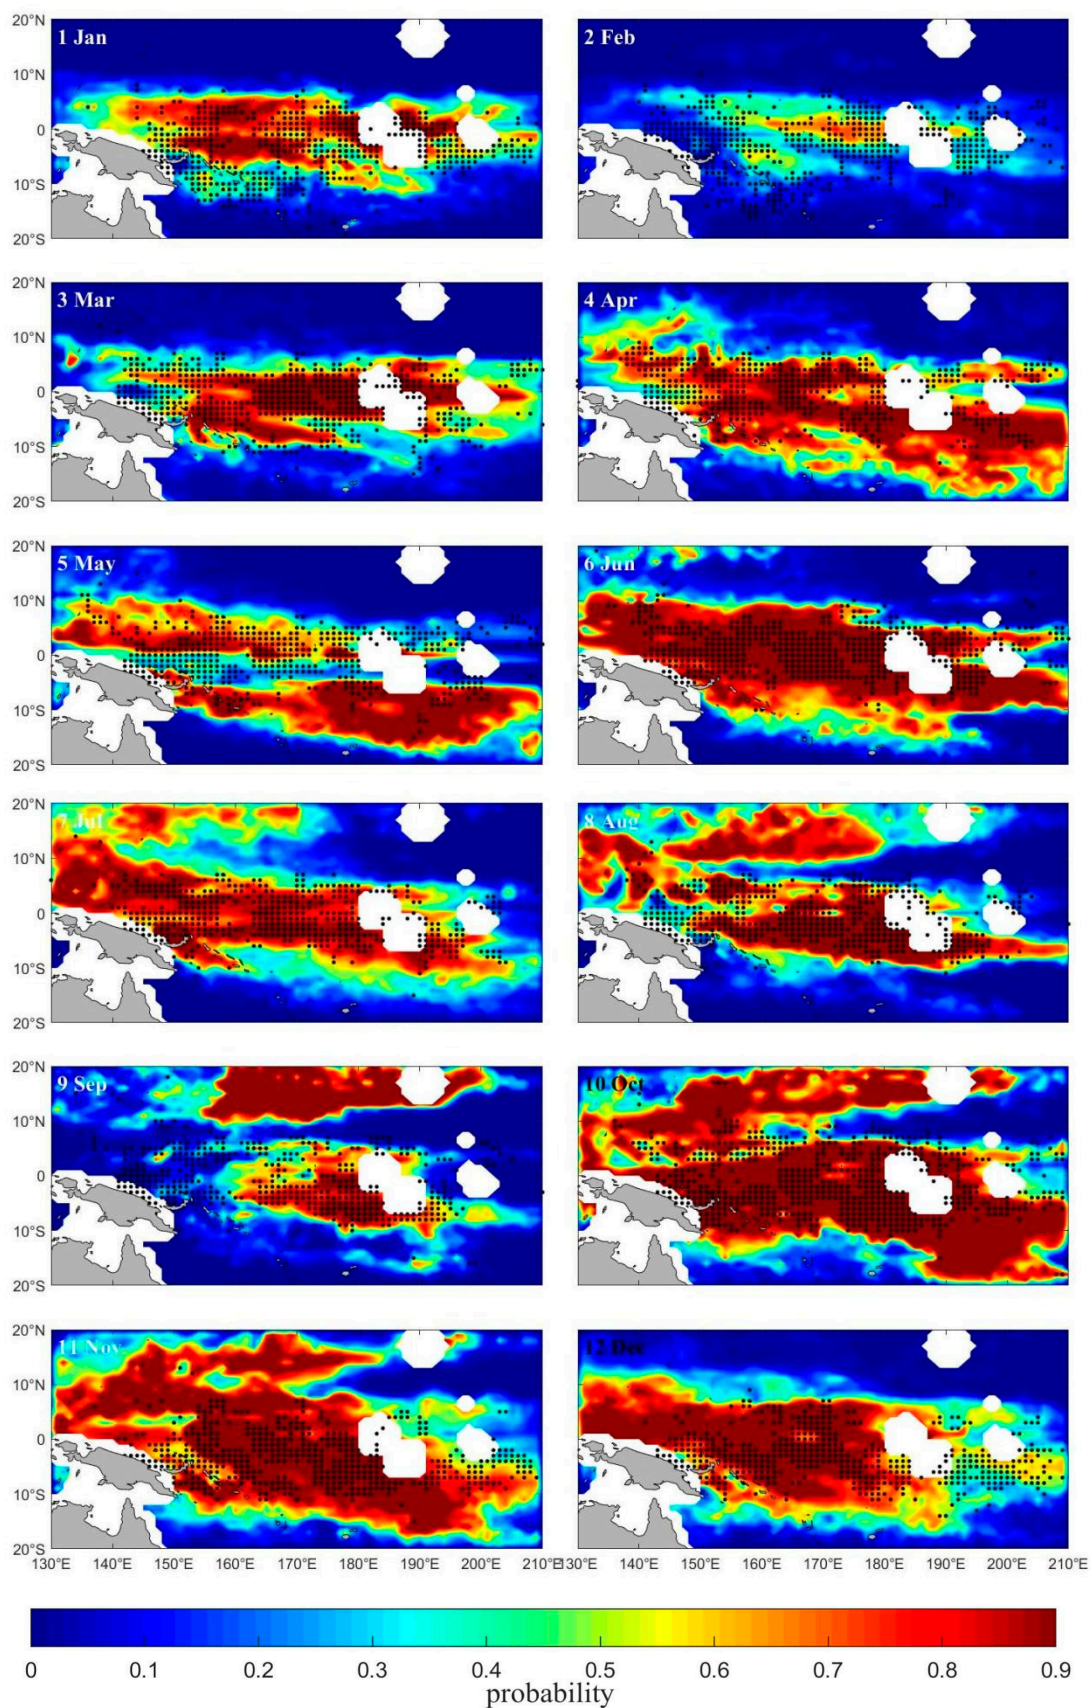

**Figure S22.** The spatial distribution of fishing data locations (black dots) overlain on habitat suitability maps for each month in 2020 in the GFW\_1° model.

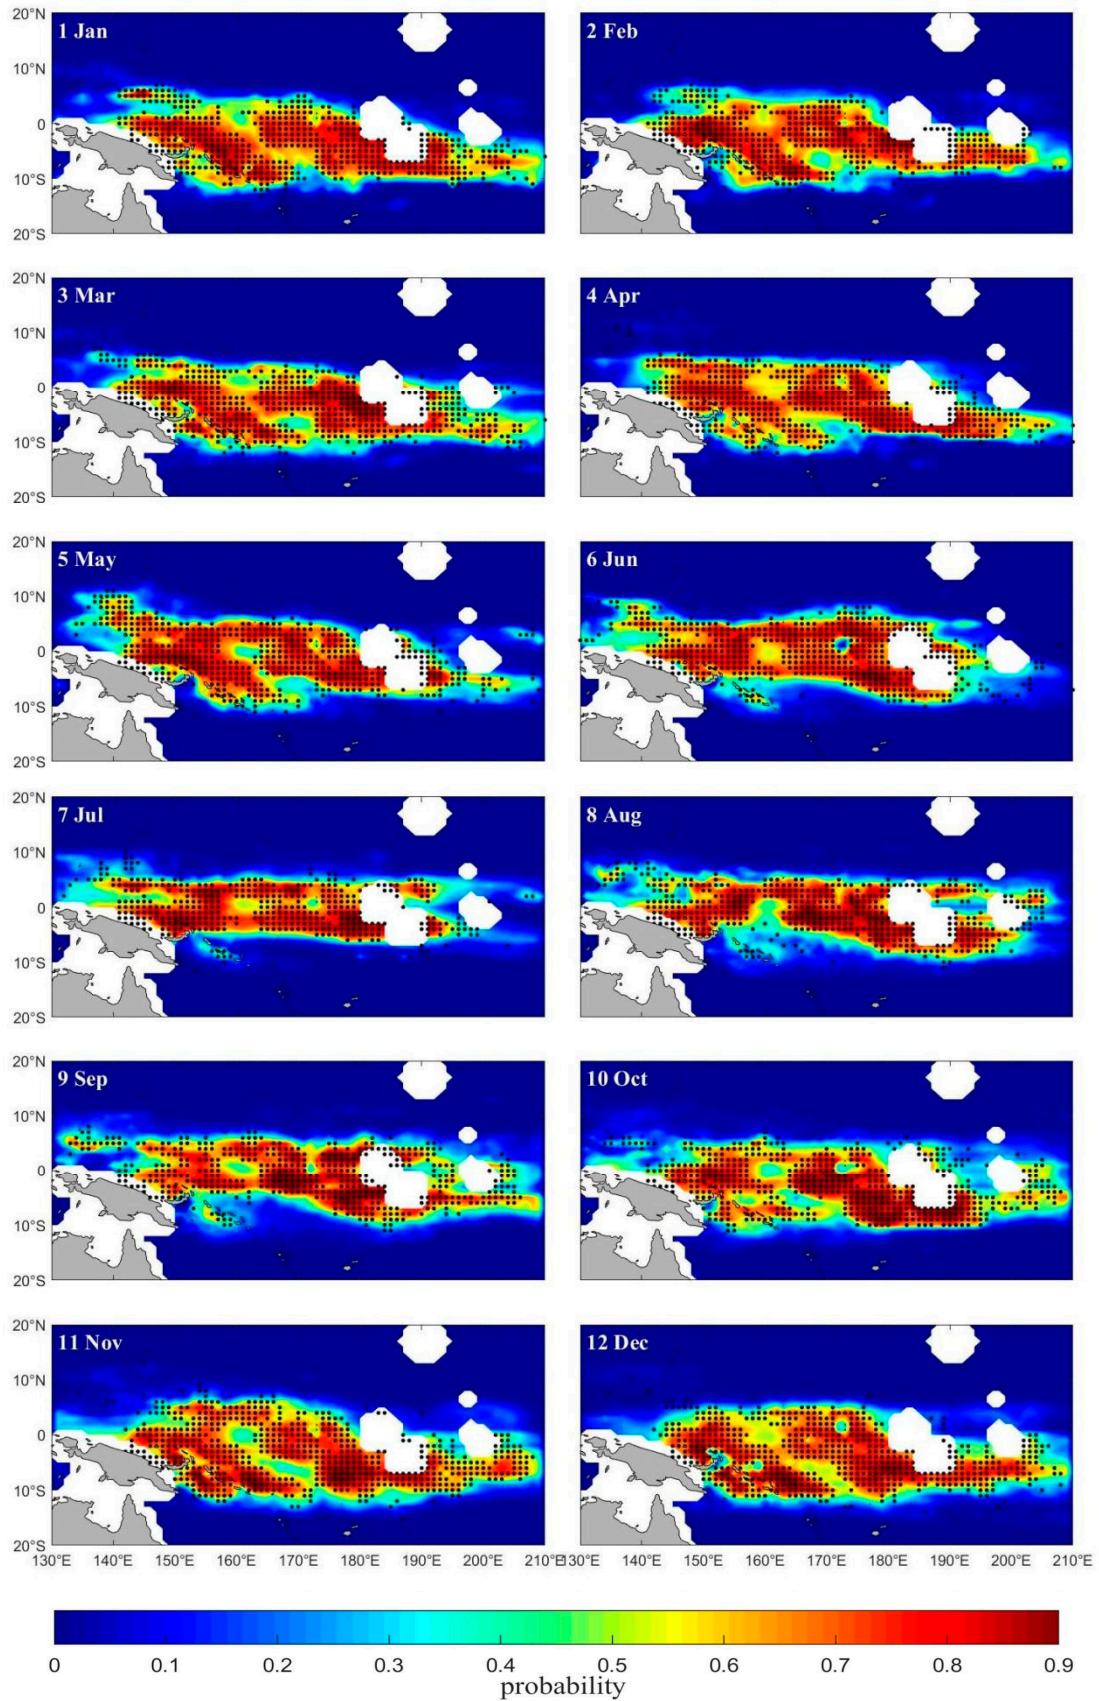

**Figure S23.** The spatial distribution of fishery data locations (black dots) overlain on habitat suitability maps for each month during 2015-2019 based on fishery data.

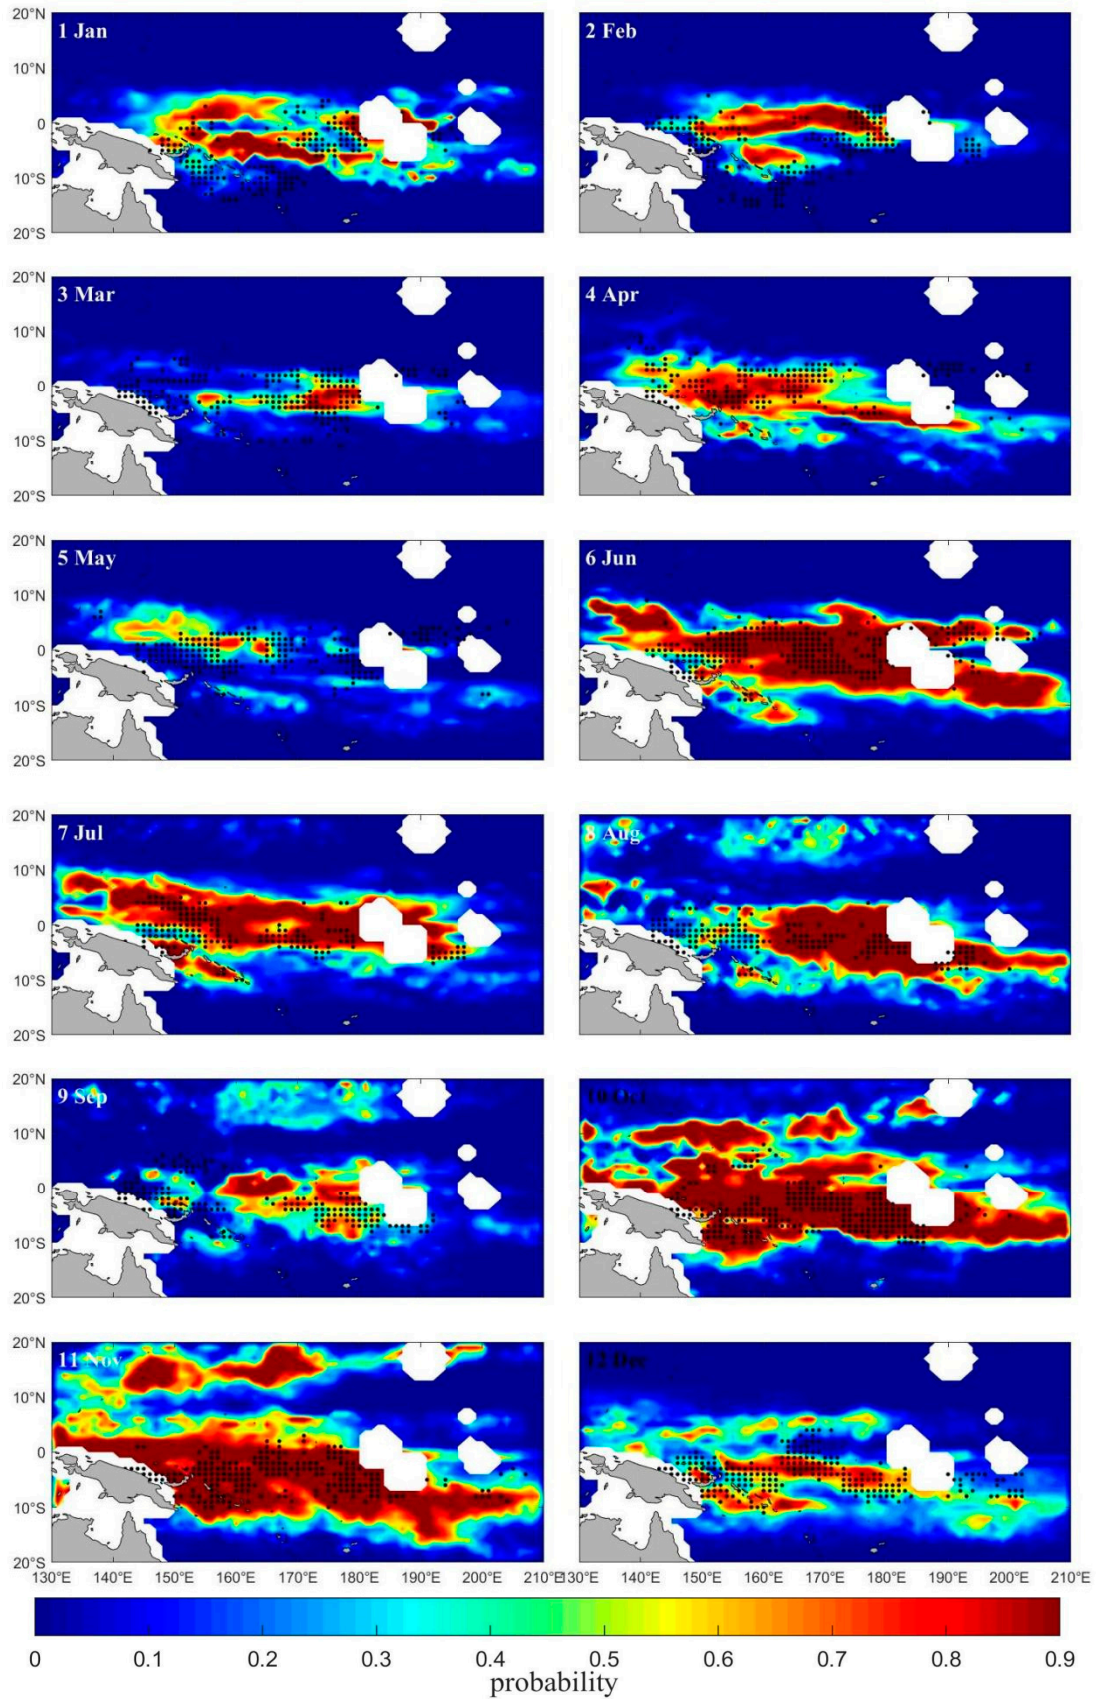

**Figure S24.** The spatial distribution of fishery locations (black dots) overlain on habitat suitability maps for each month in 2020 based on fishery data.

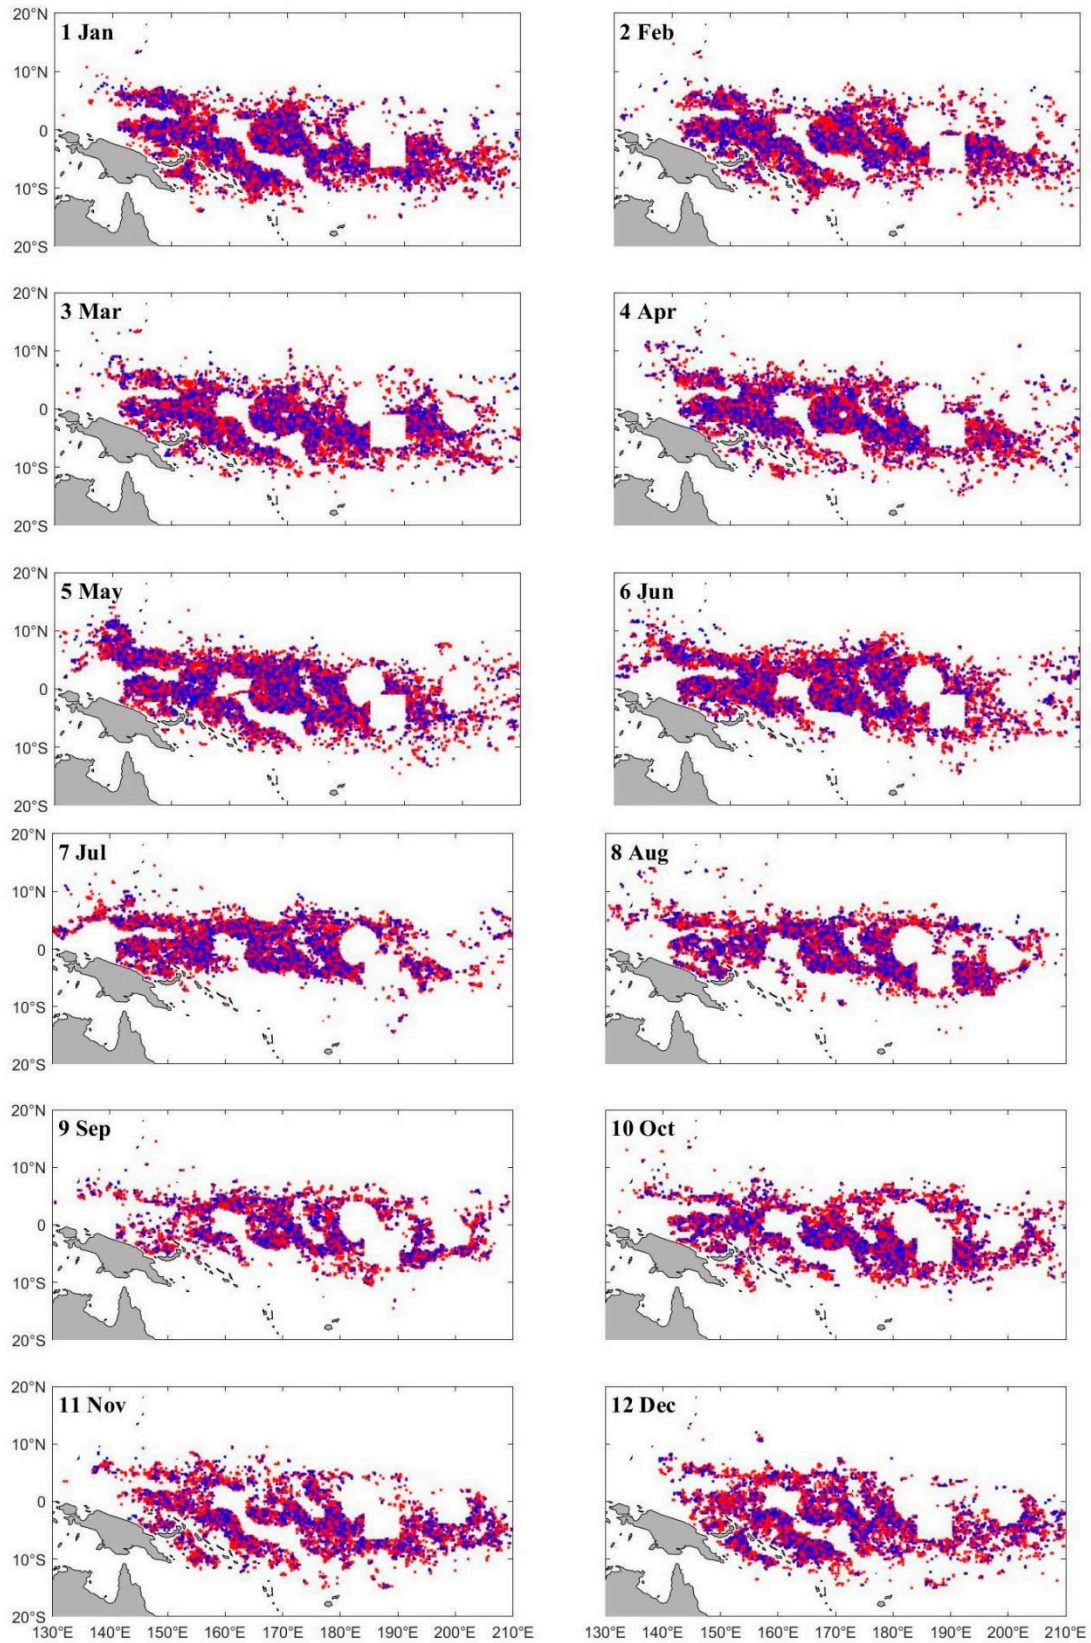

**Figure S25** The spatial distribution of sample data in the GFW\_0.25° model based on FE data. Red dots show the presence locations used for training, while violet dots show test locations.

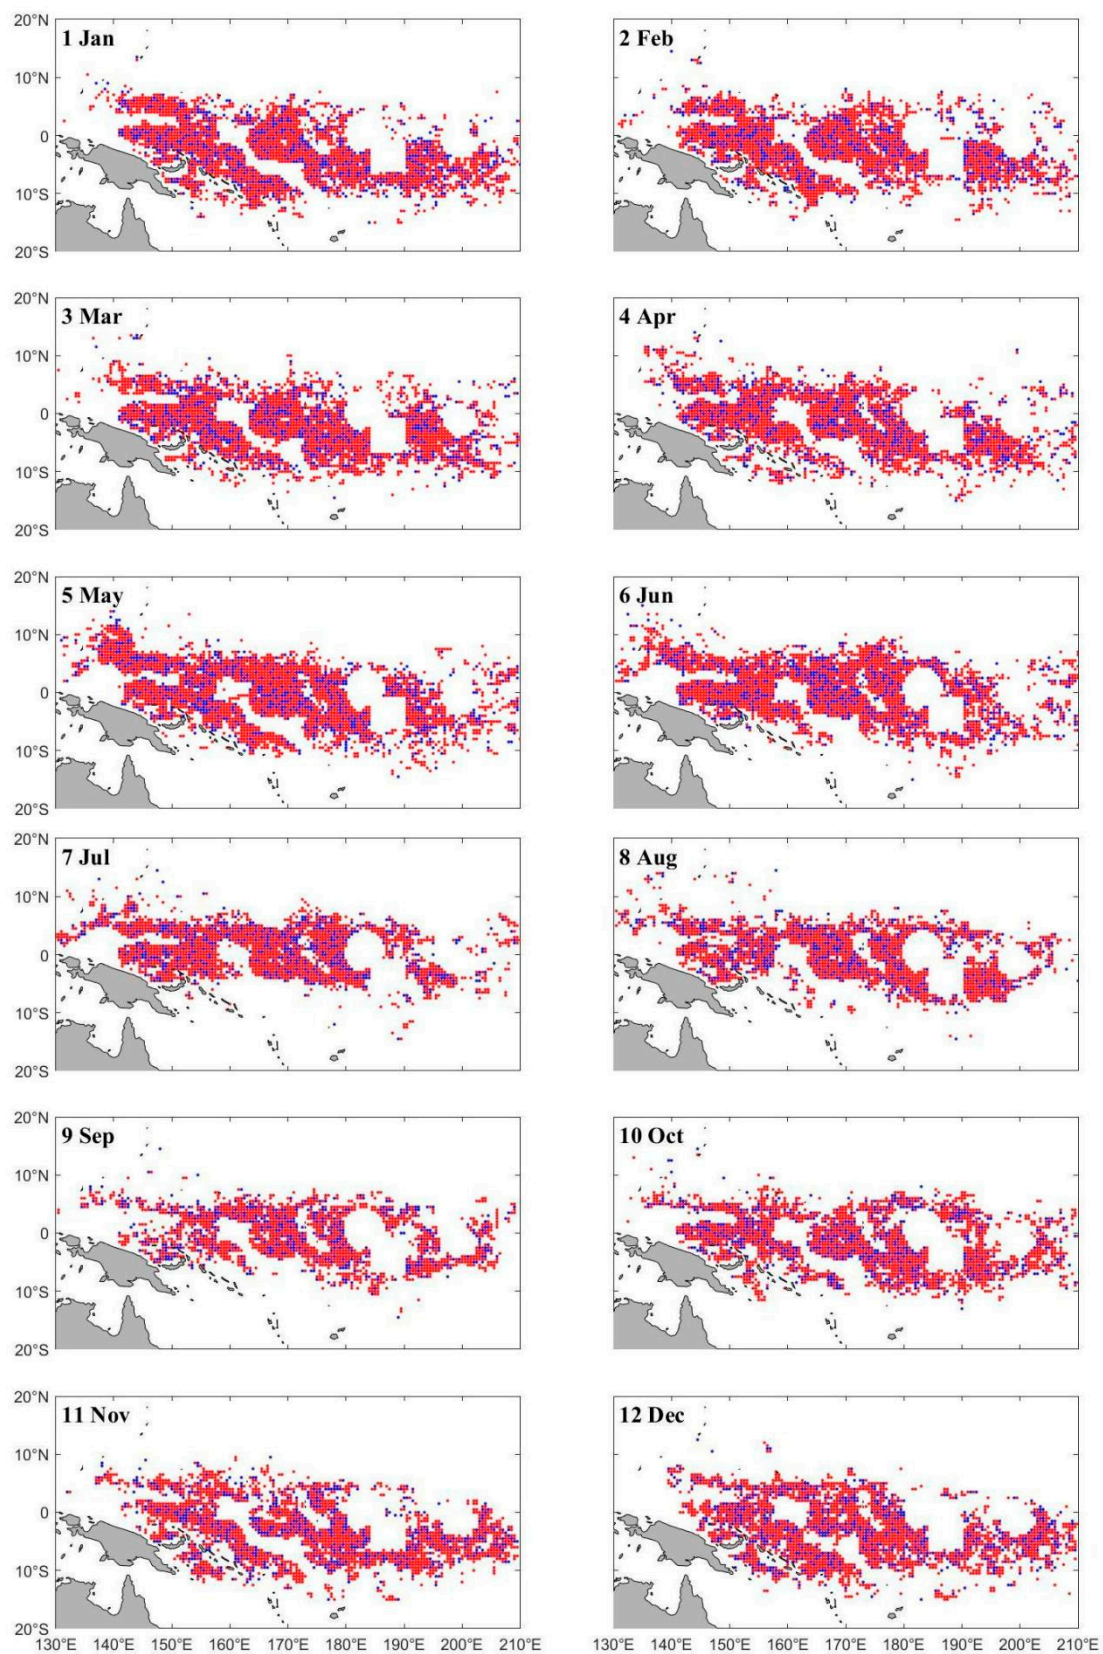

**Figure S26** The spatial distribution of sample data in the GFW\_0.5° model based on FE data. Red dots show the presence locations used for training, while violet dots show test locations.

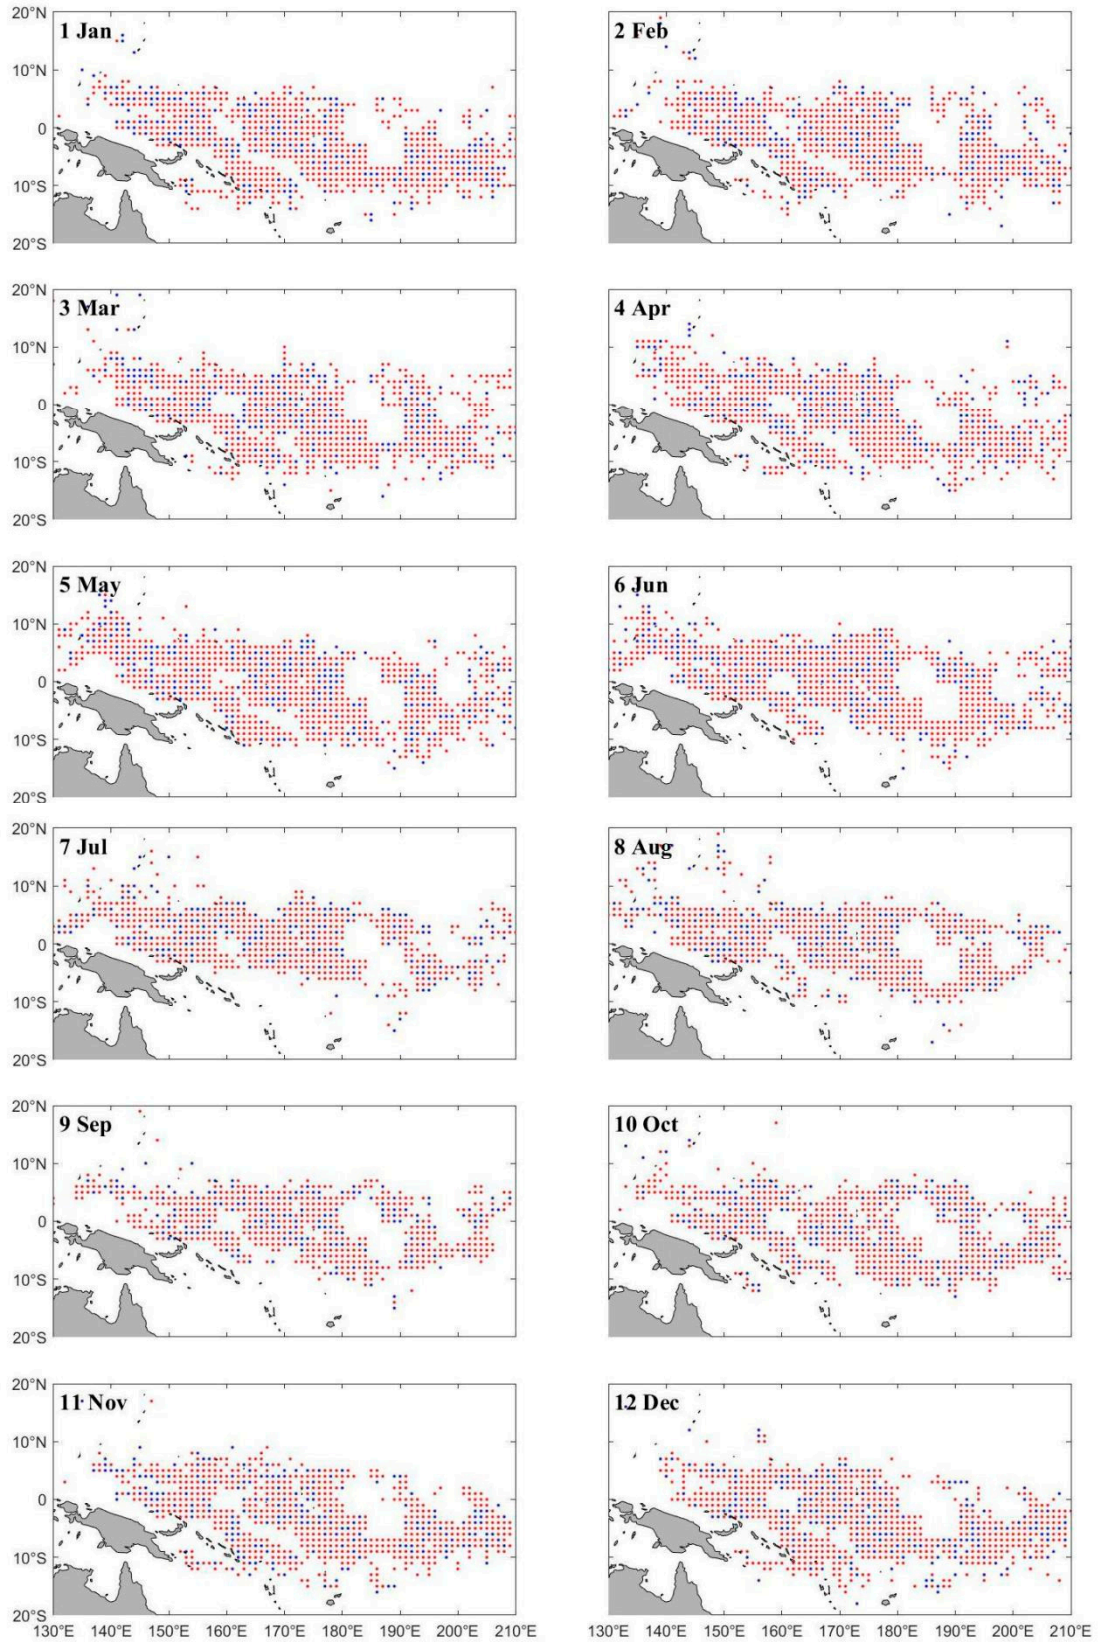

**Figure S27** The spatial distribution of sample data in the GFW\_1° model based on FE data. Red dots show the presence locations used for training, while violet dots show test locations.

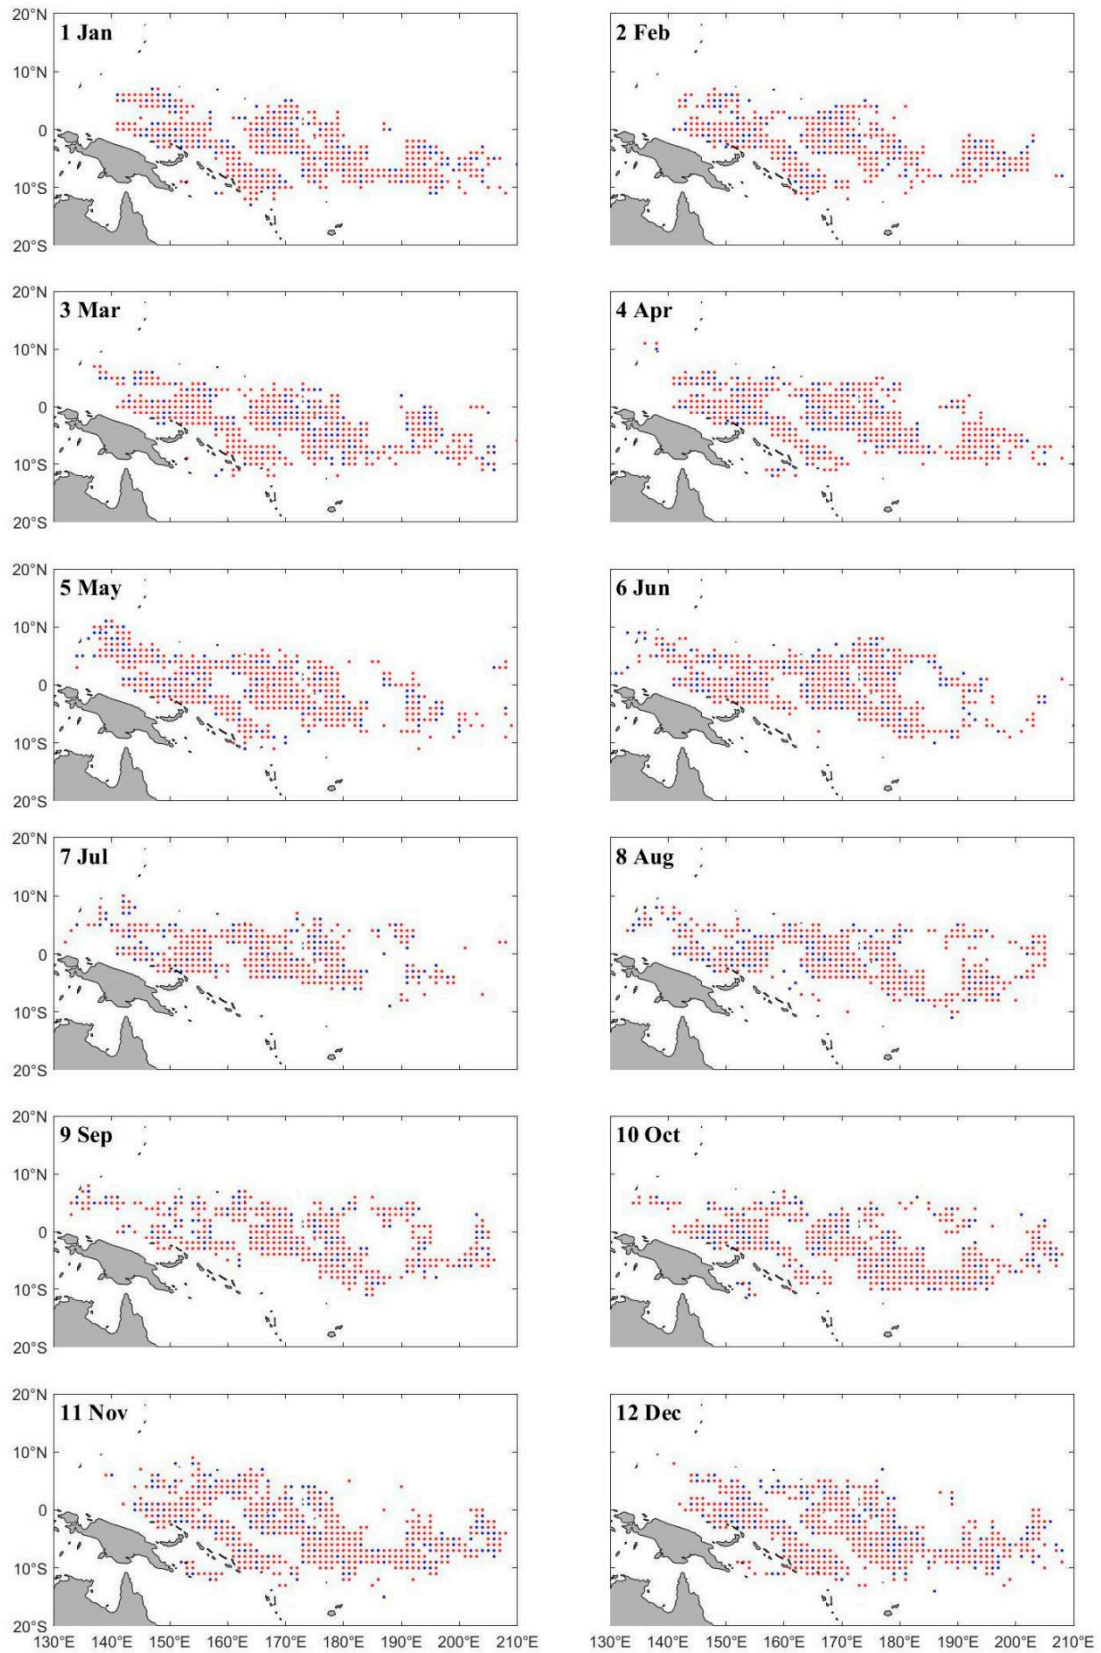

**Figure S28** The spatial distribution of sample data in the GFW\_1° model based on fishery data. Red dots show the presence locations used for training, while violet dots show test locations.

**Table S1.** Summary of environmental data and description.

| Abbreviation | Variable explained                        | Unit                                  | Spatial resolution |
|--------------|-------------------------------------------|---------------------------------------|--------------------|
| SST          | Sea surface temperature                   | degrees_C                             | 0.083° × 0.083°    |
| SSH          | Sea surface height                        | m                                     | 0.083° × 0.083°    |
| SSS          | Sea surface salinity                      | 1e <sup>-3</sup>                      | 0.083° × 0.083°    |
| Mld          | Mixed layer depth                         | m                                     | 0.083° × 0.083°    |
| U            | Geostrophic zonal velocity                | m/s                                   | 0.083° × 0.083°    |
| V            | Geostrophic meridional velocity           | m/s                                   | 0.083° × 0.083°    |
| Dox          | Dissolved oxygen                          | mmol·m <sup>-3</sup>                  | 0.25° × 0.25°      |
| PP           | Total Primary Production                  | mg·m <sup>-3</sup> ·day <sup>-1</sup> | 0.25° × 0.25°      |
| Chl          | Sea surface total Chlorophyll             | mg·m <sup>-3</sup>                    | 0.25° × 0.25°      |
| T100         | The temperature at 92.33 metres           | degrees_C                             | 0.083° × 0.083°    |
| S100         | The salinity at 92.33 metres              | 1e <sup>-3</sup>                      | 0.083° × 0.083°    |
| O100         | The oxygen concentration at 97.04 metres  | mmol·m <sup>-3</sup>                  | 0.25° × 0.25°      |
| PP100        | Total Primary Production 97.04 metres     | mg·m <sup>-3</sup>                    | 0.25° × 0.25°      |
| Chl100       | The total Chlorophyll at 97.04 metres     | mg·m <sup>-3</sup>                    | 0.25° × 0.25°      |
| T200         | The temperature at 186.12 metres          | degrees_C                             | 0.083° × 0.083°    |
| S200         | The salinity at 186.12 metres             | 1e <sup>-3</sup>                      | 0.083° × 0.083°    |
| O200         | The oxygen concentration at 199.79 metres | mmol·m <sup>-3</sup>                  | 0.25° × 0.25°      |
| PP200        | Total Primary Production at 199.79 metres | mg·m <sup>-3</sup>                    | 0.25° × 0.25°      |
| chl200       | The total Chlorophyll at 199.79 metres    | mg·m <sup>-3</sup>                    | 0.25° × 0.25°      |
| Depth        | Bathymetry                                | m                                     | 0.083° × 0.083°    |
| DSH          | Distance to nearest shore                 | km                                    | 0.01° × 0.01°      |
| DPT          | Distance to nearest port                  | km                                    | 0.01° × 0.01°      |

**Table S2.** Summary of VIF statistics.

|           |       |       |        |       |       |       |      |      |        |      |      |
|-----------|-------|-------|--------|-------|-------|-------|------|------|--------|------|------|
| variables | therm | SST   | Chl    | PP    | T200  | S200  | SSH  | S100 | Chl100 | SSS  | T100 |
| VIF       | 39.91 | 35.51 | 26.63  | 21.18 | 17.07 | 15.28 | 8.37 | 5.63 | 5.42   | 5.04 | 4.53 |
| variables | PP200 | PP100 | Chl200 | O100  | Dox   | O200  | Mld  | U    | V      | EKE  | SSTf |
| VIF       | 3.92  | 3.89  | 3.87   | 3.26  | 2.94  | 2.38  | 1.89 | 1.46 | 1.16   | 1.17 | 1.12 |

**Table S3** Contribution of each factor in each month for the GFW\_0.25° model.

|     |      |      |      |      |      |      |      |       |       |      |      |      |
|-----|------|------|------|------|------|------|------|-------|-------|------|------|------|
|     | 1    | 2    | 3    | 4    | 5    | 6    | 7    | 8     | 9     | 10   | 11   | 12   |
| DPT | 0.70 | 0.22 | 0.68 | 0.32 | 0.20 | 0.03 | 0.25 | 0.19  | 0.42  | 0.36 | 0.90 | 0.17 |
| DSH | 5.24 | 3.37 | 2.59 | 4.00 | 5.47 | 3.70 | 2.24 | 2.36  | 2.76  | 5.04 | 7.22 | 8.99 |
| EKE | 2.29 | 0.64 | 1.84 | 4.90 | 0.57 | 0.96 | 0.23 | 12.13 | 18.03 | 4.30 | 1.19 | 0.98 |

|        |       |       |       |       |       |       |       |       |       |       |       |       |
|--------|-------|-------|-------|-------|-------|-------|-------|-------|-------|-------|-------|-------|
| Chl100 | 0.34  | 0.46  | 0.08  | 0.15  | 0.83  | 1.10  | 0.36  | 2.95  | 1.05  | 0.41  | 0.02  | 0.55  |
| Chl200 | 0.24  | 0.52  | 0.16  | 0.54  | 1.19  | 1.64  | 2.27  | 2.93  | 0.31  | 0.19  | 0.32  | 0.90  |
| EKE    | 0.32  | 0.14  | 0.05  | 0.01  | 0.00  | 0.04  | 0.01  | 0.04  | 0.38  | 0.05  | 0.05  | 0.09  |
| Mld    | 2.70  | 2.22  | 4.28  | 2.38  | 7.15  | 1.25  | 0.18  | 0.80  | 3.02  | 0.48  | 0.15  | 1.67  |
| Dox    | 0.36  | 2.06  | 0.97  | 4.21  | 0.56  | 1.30  | 5.38  | 0.94  | 0.89  | 2.45  | 1.64  | 1.30  |
| O100   | 7.81  | 2.41  | 6.39  | 7.37  | 10.32 | 34.37 | 37.90 | 34.50 | 19.85 | 6.36  | 11.17 | 10.44 |
| O200   | 1.91  | 1.24  | 0.28  | 0.33  | 7.44  | 0.23  | 9.36  | 12.99 | 6.12  | 3.90  | 1.21  | 3.99  |
| PP     | 22.29 | 49.99 | 45.48 | 30.23 | 23.75 | 6.50  | 0.66  | 0.37  | 12.41 | 50.03 | 27.98 | 12.41 |
| PP100  | 0.79  | 0.71  | 0.73  | 0.85  | 1.29  | 3.47  | 0.72  | 1.46  | 0.23  | 0.04  | 0.27  | 0.43  |
| PP200  | 0.84  | 0.70  | 0.37  | 0.71  | 0.36  | 4.77  | 0.78  | 0.51  | 1.85  | 0.27  | 0.68  | 0.69  |
| S100   | 1.57  | 1.01  | 1.87  | 0.97  | 0.91  | 1.15  | 0.04  | 0.26  | 1.48  | 1.44  | 1.60  | 0.54  |
| S200   | 0.62  | 2.76  | 0.77  | 1.08  | 1.44  | 1.48  | 6.48  | 0.93  | 2.15  | 2.08  | 4.29  | 3.26  |
| SSH    | 0.40  | 1.07  | 0.00  | 0.54  | 3.09  | 2.52  | 0.27  | 0.05  | 0.06  | 0.24  | 0.01  | 0.10  |
| SSS    | 2.60  | 0.45  | 1.23  | 1.11  | 2.24  | 0.60  | 2.56  | 3.12  | 2.62  | 2.79  | 1.97  | 3.23  |
| SST    | 28.06 | 15.28 | 7.29  | 22.16 | 28.12 | 29.30 | 29.70 | 15.02 | 4.44  | 5.15  | 2.71  | 2.72  |
| SSTf   | 0.01  | 0.28  | 0.20  | 0.40  | 0.13  | 0.00  | 0.03  | 0.00  | 0.03  | 0.04  | 0.03  | 0.01  |
| T100   | 20.61 | 14.12 | 20.19 | 17.42 | 4.84  | 5.58  | 0.40  | 7.68  | 20.85 | 14.26 | 36.50 | 47.44 |
| U      | 0.17  | 0.06  | 4.51  | 0.02  | 0.10  | 0.02  | 0.20  | 0.09  | 0.10  | 0.02  | 0.08  | 0.04  |
| V      | 0.14  | 0.31  | 0.03  | 0.30  | 0.01  | 0.00  | 0.01  | 0.70  | 0.98  | 0.12  | 0.00  | 0.01  |

**Table S4** Contribution of each factor in each month for the GFW\_0.5° model.

|        | 1     | 2     | 3     | 4     | 5     | 6     | 7     | 8     | 9     | 10    | 11    | 12    |
|--------|-------|-------|-------|-------|-------|-------|-------|-------|-------|-------|-------|-------|
| DPT    | 0.35  | 0.49  | 0.38  | 0.33  | 0.11  | 0.08  | 0.41  | 0.20  | 0.34  | 0.35  | 0.37  | 0.09  |
| DSH    | 3.61  | 2.20  | 1.13  | 2.67  | 3.13  | 1.06  | 0.61  | 1.50  | 0.98  | 2.76  | 6.23  | 5.98  |
| EKE    | 0.97  | 0.78  | 1.60  | 1.14  | 0.08  | 0.59  | 0.20  | 11.59 | 19.80 | 3.85  | 0.68  | 0.81  |
| Chl100 | 0.81  | 0.23  | 0.97  | 0.39  | 0.82  | 1.40  | 0.42  | 1.80  | 0.91  | 0.60  | 0.03  | 0.88  |
| Chl200 | 0.64  | 1.95  | 0.49  | 1.24  | 0.98  | 1.30  | 1.06  | 2.48  | 0.29  | 0.21  | 0.73  | 0.15  |
| EKE    | 0.29  | 0.23  | 0.21  | 0.01  | 0.00  | 0.02  | 0.02  | 0.03  | 0.02  | 0.01  | 0.10  | 0.06  |
| Mld    | 4.07  | 1.23  | 6.56  | 6.22  | 3.04  | 1.99  | 0.87  | 0.99  | 2.35  | 0.34  | 0.46  | 1.86  |
| Dox    | 0.67  | 0.23  | 1.25  | 1.94  | 1.16  | 0.86  | 3.55  | 0.32  | 1.42  | 1.33  | 0.49  | 2.37  |
| O100   | 20.12 | 9.80  | 16.78 | 19.18 | 19.35 | 43.48 | 42.77 | 40.14 | 33.28 | 13.57 | 15.10 | 13.86 |
| O200   | 0.71  | 0.70  | 0.70  | 0.61  | 5.99  | 4.85  | 12.36 | 11.68 | 6.46  | 2.95  | 1.57  | 1.85  |
| PP     | 13.69 | 44.84 | 42.01 | 24.47 | 16.17 | 0.19  | 0.90  | 0.24  | 1.40  | 47.28 | 29.85 | 13.94 |
| PP100  | 0.75  | 0.82  | 0.33  | 0.62  | 4.74  | 1.68  | 0.70  | 1.06  | 0.51  | 0.02  | 0.60  | 0.54  |
| PP200  | 1.02  | 0.60  | 0.17  | 0.10  | 1.42  | 2.65  | 2.37  | 1.19  | 0.91  | 0.56  | 0.02  | 0.74  |
| S100   | 0.63  | 0.05  | 0.64  | 2.55  | 2.42  | 0.11  | 0.89  | 1.10  | 0.57  | 2.13  | 3.18  | 0.60  |
| S200   | 0.96  | 0.81  | 0.31  | 0.38  | 0.04  | 1.46  | 5.00  | 2.72  | 1.97  | 0.45  | 1.63  | 0.51  |
| SSH    | 0.06  | 0.82  | 0.46  | 0.11  | 0.16  | 3.46  | 0.13  | 0.13  | 0.00  | 0.05  | 0.06  | 0.26  |
| SSS    | 2.63  | 2.20  | 0.63  | 0.65  | 1.09  | 2.30  | 2.11  | 3.53  | 2.63  | 4.26  | 1.74  | 2.11  |
| SST    | 11.79 | 11.49 | 3.09  | 16.81 | 32.26 | 27.18 | 24.71 | 12.63 | 2.71  | 3.56  | 2.06  | 2.09  |
| SSTf   | 0.10  | 0.48  | 0.33  | 0.11  | 0.49  | 0.00  | 0.19  | 0.41  | 0.23  | 0.37  | 0.47  | 0.15  |
| T100   | 35.96 | 19.37 | 21.64 | 20.44 | 6.26  | 5.25  | 0.66  | 5.76  | 22.48 | 15.26 | 34.43 | 51.11 |
| U      | 0.06  | 0.41  | 0.25  | 0.01  | 0.27  | 0.02  | 0.05  | 0.19  | 0.28  | 0.03  | 0.16  | 0.02  |
| V      | 0.10  | 0.29  | 0.09  | 0.03  | 0.04  | 0.07  | 0.02  | 0.30  | 0.46  | 0.07  | 0.04  | 0.01  |

**Table S5** Contribution of each factor in each month for the GFW\_1° model.

|        | 1     | 2     | 3     | 4     | 5     | 6     | 7     | 8     | 9     | 10    | 11    | 12    |
|--------|-------|-------|-------|-------|-------|-------|-------|-------|-------|-------|-------|-------|
| DPT    | 0.06  | 0.75  | 0.23  | 0.45  | 0.10  | 0.09  | 0.09  | 0.08  | 0.51  | 0.73  | 0.95  | 0.14  |
| DSH    | 0.90  | 1.67  | 0.28  | 1.34  | 1.57  | 0.32  | 0.34  | 0.34  | 0.26  | 0.18  | 2.73  | 1.84  |
| EKE    | 1.54  | 0.31  | 0.84  | 2.02  | 0.07  | 0.55  | 0.24  | 8.33  | 17.08 | 1.11  | 0.35  | 0.44  |
| Chl100 | 0.19  | 0.27  | 0.29  | 0.95  | 2.68  | 0.69  | 0.67  | 2.26  | 1.08  | 0.34  | 0.89  | 0.79  |
| Chl200 | 0.52  | 0.21  | 0.54  | 2.22  | 4.13  | 1.27  | 1.59  | 0.88  | 0.31  | 0.59  | 0.06  | 0.02  |
| EKE    | 0.06  | 0.56  | 0.63  | 0.70  | 0.52  | 0.12  | 0.06  | 0.34  | 0.06  | 0.28  | 0.42  | 0.34  |
| Mld    | 4.88  | 0.42  | 1.23  | 5.04  | 4.43  | 0.97  | 1.69  | 0.21  | 1.10  | 1.20  | 1.07  | 2.46  |
| Dox    | 0.44  | 2.33  | 1.72  | 1.53  | 1.18  | 3.90  | 2.00  | 0.01  | 0.86  | 1.73  | 1.90  | 1.39  |
| O100   | 37.45 | 25.05 | 29.79 | 42.30 | 38.79 | 48.71 | 46.68 | 46.26 | 42.51 | 32.85 | 18.44 | 23.56 |
| O200   | 0.73  | 3.50  | 1.46  | 0.54  | 3.83  | 8.85  | 15.48 | 7.38  | 5.87  | 5.31  | 2.08  | 0.45  |
| PP     | 5.64  | 34.66 | 27.93 | 2.78  | 0.32  | 0.06  | 0.50  | 0.10  | 0.03  | 33.52 | 27.57 | 9.61  |
| PP100  | 1.75  | 0.68  | 0.54  | 0.37  | 0.29  | 0.36  | 0.32  | 1.43  | 0.69  | 0.14  | 0.76  | 0.82  |
| PP200  | 0.74  | 0.24  | 0.23  | 0.04  | 0.03  | 0.92  | 3.39  | 0.48  | 0.55  | 0.86  | 0.27  | 0.91  |
| S100   | 0.36  | 0.50  | 0.82  | 2.06  | 1.02  | 0.96  | 0.17  | 2.28  | 1.89  | 3.65  | 4.63  | 3.54  |
| S200   | 0.77  | 0.43  | 0.85  | 4.04  | 0.93  | 2.54  | 3.40  | 1.26  | 1.13  | 0.31  | 0.39  | 2.49  |
| SSH    | 0.42  | 0.05  | 0.23  | 0.04  | 0.31  | 0.60  | 0.13  | 0.33  | 0.05  | 0.94  | 0.01  | 0.33  |
| SSS    | 2.18  | 2.32  | 1.50  | 1.10  | 0.85  | 1.41  | 2.86  | 3.68  | 2.96  | 1.28  | 1.53  | 0.93  |
| SST    | 8.29  | 6.87  | 7.76  | 9.35  | 31.59 | 20.42 | 19.27 | 16.11 | 4.39  | 2.71  | 4.15  | 2.87  |
| SSTf   | 1.04  | 0.86  | 0.85  | 1.69  | 2.73  | 0.11  | 0.57  | 0.92  | 1.05  | 1.28  | 2.13  | 1.75  |
| T100   | 31.85 | 18.13 | 21.69 | 20.96 | 3.78  | 7.12  | 0.38  | 6.82  | 16.43 | 10.68 | 29.36 | 45.07 |
| U      | 0.05  | 0.07  | 0.32  | 0.08  | 0.84  | 0.05  | 0.02  | 0.22  | 1.17  | 0.19  | 0.29  | 0.09  |
| V      | 0.14  | 0.12  | 0.26  | 0.40  | 0.03  | 0.00  | 0.14  | 0.27  | 0.04  | 0.11  | 0.02  | 0.15  |

**Table S6** Contribution of each factor in each month for the WPCFC model.

|        | 1     | 2     | 3     | 4     | 5     | 6     | 7     | 8     | 9     | 10    | 11    | 12    |
|--------|-------|-------|-------|-------|-------|-------|-------|-------|-------|-------|-------|-------|
| DPT    | 0.53  | 0.28  | 0.18  | 0.25  | 0.10  | 0.14  | 1.68  | 0.45  | 0.32  | 0.18  | 0.53  | 1.17  |
| DSH    | 1.29  | 1.21  | 0.86  | 0.58  | 2.42  | 0.67  | 0.83  | 0.52  | 0.22  | 2.60  | 4.68  | 0.84  |
| EKE    | 0.77  | 0.69  | 0.84  | 1.39  | 0.51  | 1.98  | 0.66  | 9.64  | 16.69 | 0.33  | 0.16  | 1.04  |
| Chl100 | 0.65  | 0.29  | 0.22  | 0.75  | 0.28  | 0.56  | 0.49  | 2.87  | 2.40  | 0.57  | 0.92  | 0.11  |
| Chl200 | 0.62  | 0.35  | 0.28  | 0.01  | 2.22  | 0.41  | 5.34  | 1.49  | 1.11  | 0.48  | 0.49  | 0.63  |
| EKE    | 0.09  | 0.16  | 0.75  | 0.01  | 0.06  | 1.02  | 0.38  | 0.10  | 0.17  | 0.49  | 0.53  | 0.13  |
| Mld    | 3.90  | 4.90  | 15.62 | 3.97  | 5.90  | 2.82  | 0.54  | 0.92  | 1.76  | 1.02  | 0.75  | 1.84  |
| Dox    | 0.56  | 0.33  | 1.29  | 1.90  | 0.18  | 0.85  | 6.64  | 3.24  | 0.99  | 1.22  | 3.08  | 0.38  |
| O100   | 1.10  | 2.00  | 9.80  | 5.75  | 3.22  | 41.03 | 34.32 | 43.46 | 32.03 | 5.27  | 12.57 | 14.40 |
| O200   | 0.25  | 0.24  | 1.10  | 1.23  | 6.42  | 0.20  | 4.60  | 9.97  | 5.86  | 1.30  | 1.46  | 3.66  |
| PP     | 29.17 | 49.19 | 37.84 | 33.55 | 32.28 | 3.01  | 0.21  | 0.31  | 2.92  | 55.65 | 26.53 | 15.49 |
| PP100  | 1.32  | 0.96  | 0.92  | 0.30  | 1.15  | 1.82  | 0.82  | 0.46  | 0.74  | 0.34  | 0.96  | 0.16  |
| PP200  | 0.37  | 0.41  | 0.38  | 0.15  | 1.07  | 6.09  | 4.79  | 0.42  | 0.51  | 0.18  | 0.03  | 0.32  |
| S100   | 2.69  | 0.11  | 1.23  | 0.01  | 2.59  | 1.72  | 1.20  | 0.38  | 1.91  | 3.90  | 3.44  | 5.44  |
| S200   | 2.61  | 6.47  | 0.63  | 2.18  | 0.25  | 1.84  | 1.68  | 1.79  | 1.71  | 0.25  | 3.88  | 0.67  |
| SSH    | 0.12  | 0.31  | 0.09  | 4.32  | 4.07  | 2.06  | 1.98  | 0.00  | 0.93  | 0.27  | 0.03  | 0.10  |
| SSS    | 0.81  | 0.90  | 1.15  | 1.55  | 0.61  | 1.04  | 1.46  | 3.57  | 2.91  | 5.03  | 1.22  | 1.28  |
| SST    | 28.66 | 23.12 | 16.77 | 24.77 | 28.44 | 24.15 | 30.16 | 10.61 | 2.69  | 5.66  | 7.29  | 6.26  |
| SSTf   | 0.27  | 1.73  | 0.62  | 0.70  | 1.60  | 0.48  | 0.82  | 0.54  | 3.08  | 1.60  | 0.87  | 1.48  |

|      |       |      |      |       |      |      |      |      |       |       |       |       |
|------|-------|------|------|-------|------|------|------|------|-------|-------|-------|-------|
| T100 | 23.28 | 5.74 | 7.03 | 15.03 | 5.38 | 7.75 | 1.22 | 7.53 | 18.99 | 12.77 | 30.41 | 44.29 |
| U    | 0.69  | 0.18 | 2.21 | 1.42  | 0.49 | 0.04 | 0.11 | 0.50 | 1.13  | 0.77  | 0.12  | 0.13  |
| V    | 0.23  | 0.42 | 0.20 | 0.17  | 0.75 | 0.31 | 0.08 | 1.23 | 0.93  | 0.13  | 0.05  | 0.17  |

**Table S7.** Summary statistics derived from different models without mask .

|       | Month |     | 1     | 2     | 3     | 4     | 5     | 6     | 7     | 8     | 9     | 10    | 11    | 12    |
|-------|-------|-----|-------|-------|-------|-------|-------|-------|-------|-------|-------|-------|-------|-------|
| GFW   | 0.25° | AUC | 0.886 | 0.889 | 0.881 | 0.885 | 0.882 | 0.878 | 0.902 | 0.900 | 0.908 | 0.885 | 0.884 | 0.883 |
|       |       | SD  | 0.003 | 0.003 | 0.003 | 0.003 | 0.003 | 0.003 | 0.003 | 0.003 | 0.003 | 0.003 | 0.003 | 0.003 |
|       | 0.5°  | AUC | 0.854 | 0.852 | 0.852 | 0.848 | 0.847 | 0.851 | 0.876 | 0.873 | 0.875 | 0.854 | 0.855 | 0.863 |
|       |       | SD  | 0.005 | 0.005 | 0.005 | 0.005 | 0.005 | 0.005 | 0.005 | 0.005 | 0.005 | 0.005 | 0.005 | 0.005 |
|       | 1°    | AUC | 0.801 | 0.795 | 0.783 | 0.788 | 0.786 | 0.775 | 0.828 | 0.809 | 0.829 | 0.792 | 0.800 | 0.807 |
|       |       | SD  | 0.011 | 0.012 | 0.012 | 0.011 | 0.011 | 0.011 | 0.011 | 0.011 | 0.011 | 0.012 | 0.011 | 0.011 |
| WCPFC | 1°    | AUC | 0.867 | 0.880 | 0.875 | 0.891 | 0.867 | 0.881 | 0.875 | 0.877 | 0.861 | 0.859 | 0.846 | 0.867 |
|       |       | SD  | 0.009 | 0.009 | 0.009 | 0.009 | 0.009 | 0.009 | 0.011 | 0.010 | 0.010 | 0.010 | 0.010 | 0.010 |

**Table S8.** The relative average contributions of the variables to the Maxent model without masks.

| variable | Percent contribution |          |        |       |
|----------|----------------------|----------|--------|-------|
|          | GFW_0.25°            | GFW_0.5° | GFW_1° | WCPFC |
| DPT      | 0.99                 | 0.54     | 0.35   | 0.81  |
| DSH      | 3.97                 | 2.80     | 0.01   | 0.87  |
| EKE      | 3.41                 | 2.74     | 0.81   | 2.49  |
| Chl100   | 0.79                 | 0.86     | 0.47   | 0.95  |
| Chl200   | 0.84                 | 0.74     | 1.14   | 0.78  |
| depth    | 0.13                 | 0.14     | 0.08   | 0.20  |
| Mld      | 1.97                 | 2.15     | 0.85   | 3.30  |
| Dox      | 1.54                 | 1.15     | 2.13   | 1.96  |
| O100     | 16.70                | 25.23    | 7.69   | 18.03 |
| O200     | 3.65                 | 4.04     | 30.54  | 3.45  |
| PP       | 22.10                | 18.74    | 26.04  | 16.66 |
| PP100    | 0.62                 | 0.72     | 2.47   | 4.77  |
| PP200    | 1.15                 | 0.79     | 0.81   | 1.52  |
| S100     | 1.21                 | 1.30     | 3.32   | 1.32  |
| S200     | 2.44                 | 1.39     | 2.72   | 2.44  |
| SSH      | 1.09                 | 0.81     | 0.43   | 0.97  |
| SSS      | 1.94                 | 1.65     | 2.04   | 1.32  |
| SST      | 18.93                | 15.37    | 6.45   | 20.17 |
| SSTf     | 0.12                 | 0.28     | 0.30   | 1.31  |
| T100     | 16.03                | 18.24    | 10.84  | 14.18 |
| U        | 0.11                 | 0.17     | 0.31   | 2.30  |
| V        | 0.27                 | 0.15     | 0.20   | 0.20  |
